# Supplementary material for: Exploring the function and effectiveness of knowledge brokers as facilitators of knowledge translation in health-related settings: a systematic review and thematic analysis
Source: PubMed Central journal article supplement (PMC4653833; doi:10.1186/s13012-015-0351-9), 2015-11-20
Supplement: 13012_2015_351_MOESM1_ESM.pdf [file 13012_2015_351_MOESM1_ESM.pdf]

# Knowledge brokering review

---

## Databases:

- MEDLINE (Ovid platform)
- Embase (Ovid platform)
- PsycINFO (Ovid platform)
- CINAHL (EBSCOhost platform)
- ERIC (ProQuest platform)
- Scopus (ScienceDirect platform)
- SocINDEX (EBSCOhost platform)
- Health Business Elite (EBSCOhost platform)

## Search strategies:

NB: Preliminary search conducted January 3, 2014.

### MEDLINE 1946 to Present; MEDLINE In-Process & Other Non-Indexed Citations

| #  | Searches                                                                                                                                                                                                                                                                                                                                                                                                                                                                                      | Results |
|----|-----------------------------------------------------------------------------------------------------------------------------------------------------------------------------------------------------------------------------------------------------------------------------------------------------------------------------------------------------------------------------------------------------------------------------------------------------------------------------------------------|---------|
| 1  | Knowledge Management/ or Information Dissemination/ or Translational Medical Research/ or Interdisciplinary Communication/ or Technology Transfer/                                                                                                                                                                                                                                                                                                                                            | 26769   |
| 2  | Professional Role/ or Capacity Building/ or Administrative Personnel/ or Leadership/                                                                                                                                                                                                                                                                                                                                                                                                          | 45072   |
| 3  | 1 and 2                                                                                                                                                                                                                                                                                                                                                                                                                                                                                       | 824     |
| 4  | ("know-do" or ((knowledge\$ or research\$ or information\$ or evidence\$ or science or findings) adj2 (translat\$ or transfer\$ or exchange\$ or action\$ or practice\$ or decision\$ or implement\$ or manag\$ or disseminat\$ or appl\$ or share\$ or sharing or uptak\$ or "use" or utilis\$ or utiliz\$ or mobilis\$ or mobiliz\$ or integrat\$ or communicat\$ or adopt\$)) or "technology transfer").ti,ab,kf.                                                                          | 150018  |
| 5  | ((((knowledge\$ or research\$ or information\$ or evidence\$ or science or findings) adj3 (broker\$ or go-between\$ or intermediar\$ or liaison\$ or mediator\$ or navigator\$ or officer\$ or translator\$ or facilitator\$ or leader or leaders)) or (change adj2 agent\$) or (boundary adj1 spanner) or (opinion adj1 leader\$) or (linkage adj1 agent\$) or "researcher-practitioner" or "researcher-practitioners" or (structural adj1 broker\$) or (capacity adj1 builder\$)).ti,ab,kf. | 4901    |
| 6  | 4 and 5                                                                                                                                                                                                                                                                                                                                                                                                                                                                                       | 954     |
| 7  | ((knowledge adj3 broker\$) or (knowledge adj1 manager\$)).ti,ab,kf.                                                                                                                                                                                                                                                                                                                                                                                                                           | 149     |
| 8  | 3 or 6 or 7                                                                                                                                                                                                                                                                                                                                                                                                                                                                                   | 1816    |
| 9  | limit 8 to english language                                                                                                                                                                                                                                                                                                                                                                                                                                                                   | 1718    |
| 10 | remove duplicates from 9                                                                                                                                                                                                                                                                                                                                                                                                                                                                      | 1530    |

### Embase 1974 to 2013 Week 52

| # | Searches                                                                                                                                      | Results |
|---|-----------------------------------------------------------------------------------------------------------------------------------------------|---------|
| 1 | knowledge management/ or information dissemination/ or translational research/ or interdisciplinary communication/ or professional knowledge/ | 34848   |
| 2 | professional standard/ or capacity building/ or administrative personnel/ or leadership/                                                      | 75995   |

|           |                                                                                                                                                                                                                                                                                                                                                                                                                                                                                               |        |
|-----------|-----------------------------------------------------------------------------------------------------------------------------------------------------------------------------------------------------------------------------------------------------------------------------------------------------------------------------------------------------------------------------------------------------------------------------------------------------------------------------------------------|--------|
| <b>3</b>  | 1 and 2                                                                                                                                                                                                                                                                                                                                                                                                                                                                                       | 1787   |
| <b>4</b>  | ("know-do" or ((knowledge\$ or research\$ or information\$ or evidence\$ or science or findings) adj2 (translat\$ or transfer\$ or exchang\$ or action\$ or practice\$ or decision\$ or implement\$ or manag\$ or disseminat\$ or appl\$ or share\$ or sharing or uptak\$ or "use" or utilis\$ or utiliz\$ or mobilis\$ or mobiliz\$ or integrat\$ or communicat\$ or adopt\$)) or "technology transfer").ti,ab,kw.                                                                           | 175656 |
| <b>5</b>  | ((((knowledge\$ or research\$ or information\$ or evidence\$ or science or findings) adj3 (broker\$ or go-between\$ or intermediar\$ or liaison\$ or mediator\$ or navigator\$ or officer\$ or translator\$ or facilitator\$ or leader or leaders)) or (change adj2 agent\$) or (boundary adj1 spanner) or (opinion adj1 leader\$) or (linkage adj1 agent\$) or "researcher-practitioner" or "researcher-practitioners" or (structural adj1 broker\$) or (capacity adj1 builder\$)).ti,ab,kw. | 5600   |
| <b>6</b>  | 4 and 5                                                                                                                                                                                                                                                                                                                                                                                                                                                                                       | 1018   |
| <b>7</b>  | ((knowledge adj3 broker\$) or (knowledge adj1 manager\$)).ti,ab,kw.                                                                                                                                                                                                                                                                                                                                                                                                                           | 164    |
| <b>8</b>  | 3 or 6 or 7                                                                                                                                                                                                                                                                                                                                                                                                                                                                                   | 2868   |
| <b>9</b>  | limit 8 to english language                                                                                                                                                                                                                                                                                                                                                                                                                                                                   | 2739   |
| <b>10</b> | limit 9 to exclude medline journals                                                                                                                                                                                                                                                                                                                                                                                                                                                           | 298    |

PsycINFO 1967 to December Week 4 2013 (run simultaneously in Ovid MEDLINE(R) In-Process & Other Non-Indexed Citations and Ovid MEDLINE(R) 1946 to Present to remove duplicate records)

| <b>#</b>  | <b>Searches</b>                                                                                                                                                                                                                                                                                                                                                                                                                                                                               | <b>Results</b> |
|-----------|-----------------------------------------------------------------------------------------------------------------------------------------------------------------------------------------------------------------------------------------------------------------------------------------------------------------------------------------------------------------------------------------------------------------------------------------------------------------------------------------------|----------------|
| <b>1</b>  | exp Knowledge Management/ or exp Knowledge Transfer/ or exp Knowledge Representation/ or exp Information Dissemination/ or Technology Transfer/                                                                                                                                                                                                                                                                                                                                               | 73039          |
| <b>2</b>  | exp Management Personnel/ or Professional Personnel/ or Professional Identity/ or Roles/ or exp Leadership/                                                                                                                                                                                                                                                                                                                                                                                   | 222711         |
| <b>3</b>  | 1 and 2                                                                                                                                                                                                                                                                                                                                                                                                                                                                                       | 899            |
| <b>4</b>  | ("know-do" or ((knowledge\$ or research\$ or information\$ or evidence\$ or science or findings) adj2 (translat\$ or transfer\$ or exchang\$ or action\$ or practice\$ or decision\$ or implement\$ or manag\$ or disseminat\$ or appl\$ or share\$ or sharing or uptak\$ or "use" or utilis\$ or utiliz\$ or mobilis\$ or mobiliz\$ or integrat\$ or communicat\$ or adopt\$)) or "technology transfer").ti,ab,id.                                                                           | 266400         |
| <b>5</b>  | ((((knowledge\$ or research\$ or information\$ or evidence\$ or science or findings) adj3 (broker\$ or go-between\$ or intermediar\$ or liaison\$ or mediator\$ or navigator\$ or officer\$ or translator\$ or facilitator\$ or leader or leaders)) or (change adj2 agent\$) or (boundary adj1 spanner) or (opinion adj1 leader\$) or (linkage adj1 agent\$) or "researcher-practitioner" or "researcher-practitioners" or (structural adj1 broker\$) or (capacity adj1 builder\$)).ti,ab,id. | 10661          |
| <b>6</b>  | 4 and 5                                                                                                                                                                                                                                                                                                                                                                                                                                                                                       | 1951           |
| <b>7</b>  | ((knowledge adj3 broker\$) or (knowledge adj1 manager\$)).ti,ab,id.                                                                                                                                                                                                                                                                                                                                                                                                                           | 338            |
| <b>8</b>  | 3 or 6 or 7                                                                                                                                                                                                                                                                                                                                                                                                                                                                                   | 3006           |
| <b>9</b>  | limit 8 to english language                                                                                                                                                                                                                                                                                                                                                                                                                                                                   | 2934           |
| <b>10</b> | remove duplicates from 9                                                                                                                                                                                                                                                                                                                                                                                                                                                                      | 2608           |
| <b>11</b> | 10 use psyb                                                                                                                                                                                                                                                                                                                                                                                                                                                                                   | 1243           |

CINAHL with Full Text

| #  | Query                                                                                                                                                                                                                                                                                                                                                                                                                                                                                                                                                                                                                                                                                                                                                                                                                                                                                                                | Results |
|----|----------------------------------------------------------------------------------------------------------------------------------------------------------------------------------------------------------------------------------------------------------------------------------------------------------------------------------------------------------------------------------------------------------------------------------------------------------------------------------------------------------------------------------------------------------------------------------------------------------------------------------------------------------------------------------------------------------------------------------------------------------------------------------------------------------------------------------------------------------------------------------------------------------------------|---------|
| S1 | (MH "Knowledge Management") OR (MH "Selective Dissemination of Information")                                                                                                                                                                                                                                                                                                                                                                                                                                                                                                                                                                                                                                                                                                                                                                                                                                         | 1,099   |
| S2 | (MH "Professional Role") OR (MH "Administrative Personnel") OR (MH "Management") OR (MH "Leadership")                                                                                                                                                                                                                                                                                                                                                                                                                                                                                                                                                                                                                                                                                                                                                                                                                | 47,355  |
| S3 | S1 AND S2                                                                                                                                                                                                                                                                                                                                                                                                                                                                                                                                                                                                                                                                                                                                                                                                                                                                                                            | 114     |
| S4 | TI ( "know-do" or ((knowledge* or research* or information* or evidence* or science or findings) N2 (translat* or transfer* or exchang* or action* or practice* or decision* or implement* or manag* or disseminat* or appl* or share* or sharing or uptak* or "use" or utilis* or utiliz* or mobilis* or mobiliz* or integrat* or communicat* or adopt*)) or "technology transfer" ) OR AB ( "know-do" or ((knowledge* or research* or information* or evidence* or science or findings) N2 (translat* or transfer* or exchang* or action* or practice* or decision* or implement* or manag* or disseminat* or appl* or share* or sharing or uptak* or "use" or utilis* or utiliz* or mobilis* or mobiliz* or integrat* or communicat* or adopt*)) or "technology transfer" )                                                                                                                                       | 75,539  |
| S5 | TI ( ((knowledge* or research* or information* or evidence* or science or findings) N2 (broker* or go-between* or intermediar* or liaison* or mediator* or navigator* or officer* or translator* or facilitator* or leader or leaders)) or (change N1 agent*) or (boundary NO spanner) or (opinion NO leader*) or (linkage NO agent*) or "researcher-practitioner" or "researcher-practitioners" or (structural NO broker*) or (capacity NO builder* ) ) OR AB ( ((knowledge* or research* or information* or evidence* or science or findings) N2 (broker* or go-between* or intermediar* or liaison* or mediator* or navigator* or officer* or translator* or facilitator* or leader or leaders)) or (change N1 agent*) or (boundary NO spanner) or (opinion NO leader*) or (linkage NO agent*) or "researcher-practitioner" or "researcher-practitioners" or (structural NO broker*) or (capacity NO builder* ) ) | 1,909   |
| S6 | S4 AND S5                                                                                                                                                                                                                                                                                                                                                                                                                                                                                                                                                                                                                                                                                                                                                                                                                                                                                                            | 535     |
| S7 | TI ( (knowledge N3 broker*) OR (knowledge N1 manager* ) ) OR AB ( (knowledge N3 broker*) OR (knowledge N1 manager* ) )                                                                                                                                                                                                                                                                                                                                                                                                                                                                                                                                                                                                                                                                                                                                                                                               | 100     |
| S8 | S3 OR S6 OR S7<br>Limiters - English Language; Exclude MEDLINE records                                                                                                                                                                                                                                                                                                                                                                                                                                                                                                                                                                                                                                                                                                                                                                                                                                               | 290     |

ERIC

| # | Searches                                                                                                                                                                                                                                                                                                                                                                                                                                                                                          | Results |
|---|---------------------------------------------------------------------------------------------------------------------------------------------------------------------------------------------------------------------------------------------------------------------------------------------------------------------------------------------------------------------------------------------------------------------------------------------------------------------------------------------------|---------|
| 1 | (SU.EXACT("Selective Dissemination of Information") OR SU.EXACT("Research Utilization") OR SU.EXACT.EXPLODE("Information Management") OR SU.EXACT("Information Utilization") OR SU.EXACT("Information Dissemination") OR SU.EXACT("Evaluation Utilization") OR SU.EXACT.EXPLODE("Knowledge Management") OR SU.EXACT.EXPLODE("Adoption (Ideas)") OR SU.EXACT.EXPLODE("Information Transfer") OR SU.EXACT.EXPLODE("Technology Transfer")) OR (SU.EXACT("Decision Making") AND SU.EXACT("Evidence")) | 26,016  |
| 2 | SU.EXACT("Change Agents") OR SU.EXACT("Leaders") OR SU.EXACT("Capacity Building") OR SU.EXACT("Leadership") OR SU.EXACT("Role") OR SU.EXACT("Managerial Occupations") OR SU.EXACT("Professional Occupations") OR SU.EXACT("Staff Role") OR SU.EXACT("Administrator Role") OR SU.EXACT("Administrators") OR SU.EXACT("Leadership Role")                                                                                                                                                            | 66,238  |
| 3 | 1 and 2                                                                                                                                                                                                                                                                                                                                                                                                                                                                                           | 1,741   |

|    |                                                                                                                                                                                                                                                                                                                                                                                                                                                         |         |
|----|---------------------------------------------------------------------------------------------------------------------------------------------------------------------------------------------------------------------------------------------------------------------------------------------------------------------------------------------------------------------------------------------------------------------------------------------------------|---------|
| 4  | "know-do" or ((knowledge* or research* or information* or evidence* or science or findings) N/2 (translat* or transfer* or exchange* or action* or practice* or decision* or implement* or manag* or disseminat* or appl* or share* or sharing or uptak* or "use" or utilis* or utiliz* or mobilis* or mobiliz* or integrat* or communicat* or adopt*)) or "technology transfer"                                                                        | 141,382 |
| 5  | ((knowledge* or research* or information* or evidence* or science or findings) N/2 (broker* or go-between* or intermediar* or liaison* or mediator* or navigator* or officer* or translator* or facilitator* or leader or leaders)) or (change N/1 agent*) or (boundary N/0 spanner) or (opinion N/0 leader*) or (linkage N/0 agent*) or "researcher-practitioner" or "researcher-practitioners" or (structural N/0 broker*) or (capacity N/0 builder*) | 9,906   |
| 6  | 4 and 5                                                                                                                                                                                                                                                                                                                                                                                                                                                 | 2,018   |
| 7  | health* or medic* or hospital* or care or therap* or clinic* or doctor* or physician* or nurs* or epidemiolog* or disease* or illness* or infect*                                                                                                                                                                                                                                                                                                       | 242,513 |
| 8  | (3 or 6) and 7                                                                                                                                                                                                                                                                                                                                                                                                                                          | 423     |
| 9  | (knowledge N/2 broker*) OR (knowledge N/0 manager*)                                                                                                                                                                                                                                                                                                                                                                                                     | 76      |
| 10 | 8 or 9                                                                                                                                                                                                                                                                                                                                                                                                                                                  | 486     |

#### Scopus

| # | Query                                                                                                                                                                                                                                                                                                                                                                                                                                                                                                                                                                                                                                                                                                                                                                                    | Results    |
|---|------------------------------------------------------------------------------------------------------------------------------------------------------------------------------------------------------------------------------------------------------------------------------------------------------------------------------------------------------------------------------------------------------------------------------------------------------------------------------------------------------------------------------------------------------------------------------------------------------------------------------------------------------------------------------------------------------------------------------------------------------------------------------------------|------------|
| 1 | TITLE({know-do} OR ((knowledge* OR research* OR information* OR evidence* OR science OR findings) W/2 (translat* OR transfer* OR exchange* OR action* OR practice* OR decision* OR implement* OR manag* OR disseminat* OR appl* OR share* OR sharing OR uptak* OR "use" OR utilis* OR utiliz* OR mobilis* OR mobiliz* OR integrat* OR communicat* OR adopt*)) OR (technology W/0 transfer)) OR KEY({know-do} OR ((knowledge* OR research* OR information* OR evidence* OR science OR findings) W/2 (translat* OR transfer* OR exchange* OR action* OR practice* OR decision* OR implement* OR manag* OR disseminat* OR appl* OR share* OR sharing OR uptak* OR "use" OR utilis* OR utiliz* OR mobilis* OR mobiliz* OR integrat* OR communicat* OR adopt*)) OR (technology W/0 transfer)) | 720,235    |
| 2 | TITLE-ABS-KEY(((knowledge* OR research* OR information* OR evidence* OR science OR findings) W/3 (broker* OR go-between* OR intermediar* OR liaison* OR mediator* OR navigator* OR officer* OR translator* OR facilitator* OR leader OR leaders)) OR (change W/1 agent*) OR (boundary W/0 spanner) OR (opinion W/0 leader*) OR (linkage W/0 agent*) OR {researcher-practitioner} OR {researcher-practitioners} OR (structural W/0 broker*) OR (capacity W/0 builder*))                                                                                                                                                                                                                                                                                                                   | 19,038     |
| 3 | #1 AND #2                                                                                                                                                                                                                                                                                                                                                                                                                                                                                                                                                                                                                                                                                                                                                                                | 3,604      |
| 4 | TITLE-ABS-KEY((knowledge W/2 broker*) OR (knowledge W/0 manager*))                                                                                                                                                                                                                                                                                                                                                                                                                                                                                                                                                                                                                                                                                                                       | 892        |
| 5 | #3 OR #4                                                                                                                                                                                                                                                                                                                                                                                                                                                                                                                                                                                                                                                                                                                                                                                 | 4,272      |
| 6 | TITLE-ABS-KEY(health* OR medic* OR hospital* OR care OR therap* OR clinic* OR doctor* OR physician* OR nurs* OR epidemiolog* OR disease* OR illness* OR infect*)                                                                                                                                                                                                                                                                                                                                                                                                                                                                                                                                                                                                                         | 15,834,576 |
| 7 | #5 AND #6                                                                                                                                                                                                                                                                                                                                                                                                                                                                                                                                                                                                                                                                                                                                                                                | 1,595      |
| 8 | 7 AND (LIMIT-TO(LANGUAGE, "English"))                                                                                                                                                                                                                                                                                                                                                                                                                                                                                                                                                                                                                                                                                                                                                    | 1,554      |

#### SocINDEX with Full Text

| #  | Query                                                                             | Results |
|----|-----------------------------------------------------------------------------------|---------|
| S1 | "know-do" or ((knowledge* or research* or information* or evidence* or science or | 101,457 |

|           |                                                                                                                                                                                                                                                                                                                                                                                                                                                  |       |
|-----------|--------------------------------------------------------------------------------------------------------------------------------------------------------------------------------------------------------------------------------------------------------------------------------------------------------------------------------------------------------------------------------------------------------------------------------------------------|-------|
|           | findings) N2 (translat* or transfer* or exchang* or action* or practice* or decision* or implement* or manag* or disseminat* or appl* or share* or sharing or uptak* or "use" or utilis* or utiliz* or mobilis* or mobiliz* or integrat* or communicat* or adopt*)) or "technology transfer"                                                                                                                                                     |       |
| <b>S2</b> | ((knowledge* or research* or information* or evidence* or science or findings) N2 (broker* or go-between* or intermediar* or liaison* or mediator* or navigator* or officer* or translator* or facilitator* or leader or leaders)) or (change N1 agent*) or (boundary NO spanner) or (opinion NO leader*) or (linkage NO agent*) or "researcher-practitioner" or "researcher-practitioners" or (structural NO broker*) or (capacity NO builder*) | 4,763 |
| <b>S3</b> | S1 AND S2                                                                                                                                                                                                                                                                                                                                                                                                                                        | 756   |
| <b>S4</b> | (knowledge N3 broker*) OR (knowledge NO manager*)                                                                                                                                                                                                                                                                                                                                                                                                | 95    |
| <b>S5</b> | S3 OR S4                                                                                                                                                                                                                                                                                                                                                                                                                                         | 816   |
| <b>S6</b> | S3 OR S4<br>Limiters - Language: Afrikaans, Catalan, Chinese, Croatian, Czech, Danish, Dutch/Flemish, Finnish, French, German, Galician, Hungarian, Italian, Japanese, Lithuanian, Norwegian, Polish, Portuguese, Romanian, Russian, Slovak, Slovenian, Spanish, Swedish, Turkish                                                                                                                                                                | 14    |
| <b>S7</b> | S5 NOT S6                                                                                                                                                                                                                                                                                                                                                                                                                                        | 802   |

#### Health Business Elite

| #         | Query                                                                                                                                                                                                                                                                                                                                                                                                                                            | Results |
|-----------|--------------------------------------------------------------------------------------------------------------------------------------------------------------------------------------------------------------------------------------------------------------------------------------------------------------------------------------------------------------------------------------------------------------------------------------------------|---------|
| <b>S1</b> | "know-do" or ((knowledge* or research* or information* or evidence* or science or findings) N2 (translat* or transfer* or exchang* or action* or practice* or decision* or implement* or manag* or disseminat* or appl* or share* or sharing or uptak* or "use" or utilis* or utiliz* or mobilis* or mobiliz* or integrat* or communicat* or adopt*)) or "technology transfer"                                                                   | 105,407 |
| <b>S2</b> | ((knowledge* or research* or information* or evidence* or science or findings) N2 (broker* or go-between* or intermediar* or liaison* or mediator* or navigator* or officer* or translator* or facilitator* or leader or leaders)) or (change N1 agent*) or (boundary NO spanner) or (opinion NO leader*) or (linkage NO agent*) or "researcher-practitioner" or "researcher-practitioners" or (structural NO broker*) or (capacity NO builder*) | 17,722  |
| <b>S3</b> | S1 AND S2                                                                                                                                                                                                                                                                                                                                                                                                                                        | 3,002   |
| <b>S4</b> | health* OR medic* OR hospital* OR care OR therap* OR clinic* OR doctor* OR physician* OR nurs* OR epidemiolog* OR disease* OR illness* OR infect*                                                                                                                                                                                                                                                                                                | 754,361 |
| <b>S5</b> | S3 AND S4                                                                                                                                                                                                                                                                                                                                                                                                                                        | 704     |
| <b>S6</b> | (knowledge N3 broker*) OR (knowledge NO manager*)                                                                                                                                                                                                                                                                                                                                                                                                | 118     |
| <b>S7</b> | S5 OR S6                                                                                                                                                                                                                                                                                                                                                                                                                                         | 819     |

#### Search yield:

- Gross yield: 7022
  - MEDLINE: 1530
  - Embase: 298
  - PsycINFO: 1243
  - CINAHL: 290
  - ERIC: 486

- Scopus: 1554
- SocINDEX: 802
- Health Business Elite: 819
- Duplicates: 999

## UPDATED SEARCH (JANUARY – NOVEMBER 2014)

### Databases:

- MEDLINE (Ovid platform)
- Embase (Ovid platform)
- PsycINFO (Ovid platform)
- CINAHL (EBSCOhost platform)
- ERIC (Ovid platform)
- Scopus (ScienceDirect platform)
- SocINDEX (EBSCOhost platform)
- Health Business Elite (EBSCOhost platform)

### Search strategies:

NB: Follow-up search conducted November 24, 2014.

MEDLINE 1946 to Present; MEDLINE In-Process & Other Non-Indexed Citations

| #  | Searches                                                                                                                                                                                                                                                                                                                                                                                                                                                                                      | Results |
|----|-----------------------------------------------------------------------------------------------------------------------------------------------------------------------------------------------------------------------------------------------------------------------------------------------------------------------------------------------------------------------------------------------------------------------------------------------------------------------------------------------|---------|
| 1  | Knowledge Management/ or Information Dissemination/ or Translational Medical Research/ or Interdisciplinary Communication/ or Technology Transfer/                                                                                                                                                                                                                                                                                                                                            | 29113   |
| 2  | Professional Role/ or Capacity Building/ or Administrative Personnel/ or Leadership/                                                                                                                                                                                                                                                                                                                                                                                                          | 47319   |
| 3  | 1 and 2                                                                                                                                                                                                                                                                                                                                                                                                                                                                                       | 889     |
| 4  | ("know-do" or ((knowledge\$ or research\$ or information\$ or evidence\$ or science or findings) adj2 (translat\$ or transfer\$ or exchange\$ or action\$ or practice\$ or decision\$ or implement\$ or manag\$ or disseminat\$ or appl\$ or share\$ or sharing or uptak\$ or "use" or utilis\$ or utiliz\$ or mobilis\$ or mobiliz\$ or integrat\$ or communicat\$ or adopt\$)) or "technology transfer").ti,ab,kf.                                                                          | 156501  |
| 5  | ((((knowledge\$ or research\$ or information\$ or evidence\$ or science or findings) adj3 (broker\$ or go-between\$ or intermediar\$ or liaison\$ or mediator\$ or navigator\$ or officer\$ or translator\$ or facilitator\$ or leader or leaders)) or (change adj2 agent\$) or (boundary adj1 spanner) or (opinion adj1 leader\$) or (linkage adj1 agent\$) or "researcher-practitioner" or "researcher-practitioners" or (structural adj1 broker\$) or (capacity adj1 builder\$)).ti,ab,kf. | 5035    |
| 6  | 4 and 5                                                                                                                                                                                                                                                                                                                                                                                                                                                                                       | 970     |
| 7  | ((knowledge adj3 broker\$) or (knowledge adj1 manager\$)).ti,ab,kf.                                                                                                                                                                                                                                                                                                                                                                                                                           | 159     |
| 8  | 3 or 6 or 7                                                                                                                                                                                                                                                                                                                                                                                                                                                                                   | 1914    |
| 9  | limit 8 to english language                                                                                                                                                                                                                                                                                                                                                                                                                                                                   | 1799    |
| 10 | remove duplicates from 9                                                                                                                                                                                                                                                                                                                                                                                                                                                                      | 1723    |
| 11 | limit 10 to yr="2014 -Current"                                                                                                                                                                                                                                                                                                                                                                                                                                                                | 132     |

Embase 1974 to 2014 November 20

| #  | Searches                                                                                                                                                                                                                                                                                                                                                                                                                                                                                      | Results |
|----|-----------------------------------------------------------------------------------------------------------------------------------------------------------------------------------------------------------------------------------------------------------------------------------------------------------------------------------------------------------------------------------------------------------------------------------------------------------------------------------------------|---------|
| 1  | knowledge management/ or information dissemination/ or translational research/ or interdisciplinary communication/ or professional knowledge/                                                                                                                                                                                                                                                                                                                                                 | 39002   |
| 2  | professional standard/ or capacity building/ or administrative personnel/ or leadership/                                                                                                                                                                                                                                                                                                                                                                                                      | 81355   |
| 3  | 1 and 2                                                                                                                                                                                                                                                                                                                                                                                                                                                                                       | 1983    |
| 4  | ("know-do" or ((knowledge\$ or research\$ or information\$ or evidence\$ or science or findings) adj2 (translat\$ or transfer\$ or exchange\$ or action\$ or practice\$ or decision\$ or implement\$ or manag\$ or disseminat\$ or appl\$ or share\$ or sharing or uptak\$ or "use" or utilis\$ or utiliz\$ or mobilis\$ or mobiliz\$ or integrat\$ or communicat\$ or adopt\$)) or "technology transfer").ti,ab,kw.                                                                          | 188297  |
| 5  | ((((knowledge\$ or research\$ or information\$ or evidence\$ or science or findings) adj3 (broker\$ or go-between\$ or intermediar\$ or liaison\$ or mediator\$ or navigator\$ or officer\$ or translator\$ or facilitator\$ or leader or leaders)) or (change adj2 agent\$) or (boundary adj1 spanner) or (opinion adj1 leader\$) or (linkage adj1 agent\$) or "researcher-practitioner" or "researcher-practitioners" or (structural adj1 broker\$) or (capacity adj1 builder\$)).ti,ab,kw. | 5931    |
| 6  | 4 and 5                                                                                                                                                                                                                                                                                                                                                                                                                                                                                       | 1121    |
| 7  | ((knowledge adj3 broker\$) or (knowledge adj1 manager\$)).ti,ab,kw.                                                                                                                                                                                                                                                                                                                                                                                                                           | 192     |
| 8  | 3 or 6 or 7                                                                                                                                                                                                                                                                                                                                                                                                                                                                                   | 3172    |
| 9  | limit 8 to english language                                                                                                                                                                                                                                                                                                                                                                                                                                                                   | 3027    |
| 10 | limit 9 to exclude medline journals                                                                                                                                                                                                                                                                                                                                                                                                                                                           | 334     |
| 11 | limit 10 to yr="2014 -Current"                                                                                                                                                                                                                                                                                                                                                                                                                                                                | 30      |

PsycINFO 1967 to November Week 3 2014 (run simultaneously in Ovid MEDLINE(R) In-Process & Other Non-Indexed Citations and Ovid MEDLINE(R) 1946 to Present to remove duplicate records)

Ovid MEDLINE(R), PsycINFO

| # | Searches                                                                                                                                                                                                                                                                                                                                                                                                                                                                                      | Results |
|---|-----------------------------------------------------------------------------------------------------------------------------------------------------------------------------------------------------------------------------------------------------------------------------------------------------------------------------------------------------------------------------------------------------------------------------------------------------------------------------------------------|---------|
| 1 | exp Knowledge Management/ or exp Knowledge Transfer/ or exp Knowledge Representation/ or exp Information Dissemination/ or Technology Transfer/                                                                                                                                                                                                                                                                                                                                               | 78178   |
| 2 | exp Management Personnel/ or Professional Personnel/ or Professional Identity/ or Roles/ or exp Leadership/                                                                                                                                                                                                                                                                                                                                                                                   | 232603  |
| 3 | 1 and 2                                                                                                                                                                                                                                                                                                                                                                                                                                                                                       | 962     |
| 4 | ("know-do" or ((knowledge\$ or research\$ or information\$ or evidence\$ or science or findings) adj2 (translat\$ or transfer\$ or exchange\$ or action\$ or practice\$ or decision\$ or implement\$ or manag\$ or disseminat\$ or appl\$ or share\$ or sharing or uptak\$ or "use" or utilis\$ or utiliz\$ or mobilis\$ or mobiliz\$ or integrat\$ or communicat\$ or adopt\$)) or "technology transfer").ti,ab,id.                                                                          | 283999  |
| 5 | ((((knowledge\$ or research\$ or information\$ or evidence\$ or science or findings) adj3 (broker\$ or go-between\$ or intermediar\$ or liaison\$ or mediator\$ or navigator\$ or officer\$ or translator\$ or facilitator\$ or leader or leaders)) or (change adj2 agent\$) or (boundary adj1 spanner) or (opinion adj1 leader\$) or (linkage adj1 agent\$) or "researcher-practitioner" or "researcher-practitioners" or (structural adj1 broker\$) or (capacity adj1 builder\$)).ti,ab,id. | 11348   |
| 6 | 4 and 5                                                                                                                                                                                                                                                                                                                                                                                                                                                                                       | 2108    |
| 7 | ((knowledge adj3 broker\$) or (knowledge adj1 manager\$)).ti,ab,id.                                                                                                                                                                                                                                                                                                                                                                                                                           | 377     |

|           |                                |      |
|-----------|--------------------------------|------|
| <b>8</b>  | 3 or 6 or 7                    | 3250 |
| <b>9</b>  | limit 8 to english language    | 3172 |
| <b>10</b> | remove duplicates from 9       | 2902 |
| <b>11</b> | 10 use psyb                    | 1411 |
| <b>12</b> | limit 11 to yr="2014 -Current" | 124  |

#### CINAHL with Full Text

| #         | Query                                                                                                                                                                                                                                                                                                                                                                                                                                                                                                                                                                                                                                                                                                                                                                                                                                                                                                              | Limiters/Expanders                                                                                                          | Results |
|-----------|--------------------------------------------------------------------------------------------------------------------------------------------------------------------------------------------------------------------------------------------------------------------------------------------------------------------------------------------------------------------------------------------------------------------------------------------------------------------------------------------------------------------------------------------------------------------------------------------------------------------------------------------------------------------------------------------------------------------------------------------------------------------------------------------------------------------------------------------------------------------------------------------------------------------|-----------------------------------------------------------------------------------------------------------------------------|---------|
| <b>S8</b> | S3 OR S6 OR S7                                                                                                                                                                                                                                                                                                                                                                                                                                                                                                                                                                                                                                                                                                                                                                                                                                                                                                     | Limiters - Published<br>Date: 20140101-20141231; English Language; Exclude MEDLINE records<br>Search modes - Boolean/Phrase | 15      |
| <b>S7</b> | TI ( (knowledge N3 broker*) OR (knowledge N1 manager*) ) OR AB ( (knowledge N3 broker*) OR (knowledge N1 manager*) )                                                                                                                                                                                                                                                                                                                                                                                                                                                                                                                                                                                                                                                                                                                                                                                               | Search modes - Boolean/Phrase                                                                                               | 111     |
| <b>S6</b> | S4 AND S5                                                                                                                                                                                                                                                                                                                                                                                                                                                                                                                                                                                                                                                                                                                                                                                                                                                                                                          | Search modes - Boolean/Phrase                                                                                               | 571     |
| <b>S5</b> | TI ( ((knowledge* or research* or information* or evidence* or science or findings) N2 (broker* or go-between* or intermediar* or liaison* or mediator* or navigator* or officer* or translator* or facilitator* or leader or leaders)) or (change N1 agent*) or (boundary N0 spanner) or (opinion N0 leader*) or (linkage N0 agent*) or "researcher-practitioner" or "researcher-practitioners" or (structural N0 broker*) or (capacity N0 builder*) ) OR AB ( ((knowledge* or research* or information* or evidence* or science or findings) N2 (broker* or go-between* or intermediar* or liaison* or mediator* or navigator* or officer* or translator* or facilitator* or leader or leaders)) or (change N1 agent*) or (boundary N0 spanner) or (opinion N0 leader*) or (linkage N0 agent*) or "researcher-practitioner" or "researcher-practitioners" or (structural N0 broker*) or (capacity N0 builder*) ) | Search modes - Boolean/Phrase                                                                                               | 2,007   |
| <b>S4</b> | TI ( "know-do" or ((knowledge* or research* or information* or evidence* or science or findings) N2 (translat* or transfer* or exchang* or action* or practice* or decision* or implement* or manag* or disseminat* or appl* or share* or sharing or uptak* or "use" or utilis* or utiliz* or mobilis* or mobiliz* or integrat* or communicat* or adopt*)) or "technology transfer" ) OR AB ( "know-do" or ((knowledge* or                                                                                                                                                                                                                                                                                                                                                                                                                                                                                         | Search modes - Boolean/Phrase                                                                                               | 80,715  |



|           |                                                                                                                                                                                                                                                                                                                                                     |                               |        |
|-----------|-----------------------------------------------------------------------------------------------------------------------------------------------------------------------------------------------------------------------------------------------------------------------------------------------------------------------------------------------------|-------------------------------|--------|
|           | research* or information* or evidence* or science or findings) N2 (translat* or transfer* or exchange* or action* or practice* or decision* or implement* or manag* or disseminat* or appl* or share* or sharing or uptak* or "use" or utilis* or utiliz* or mobilis* or mobiliz* or integrat* or communicat* or adopt*) or "technology transfer" ) |                               |        |
| <b>S3</b> | S1 AND S2                                                                                                                                                                                                                                                                                                                                           | Search modes - Boolean/Phrase | 128    |
| <b>S2</b> | (MH "Professional Role") OR (MH "Administrative Personnel") OR (MH "Management") OR (MH "Leadership")                                                                                                                                                                                                                                               | Search modes - Boolean/Phrase | 51,004 |
| <b>S1</b> | (MH "Knowledge Management") OR (MH "Selective Dissemination of Information")                                                                                                                                                                                                                                                                        | Search modes - Boolean/Phrase | 1,197  |

#### ERIC

| #         | Searches                                                                                                                                                                                                                                                                                                                                                                                                                                                              | Results |
|-----------|-----------------------------------------------------------------------------------------------------------------------------------------------------------------------------------------------------------------------------------------------------------------------------------------------------------------------------------------------------------------------------------------------------------------------------------------------------------------------|---------|
| <b>1</b>  | ("Selective Dissemination of Information"/ or Research Utilization/ or exp Information Management/ or Information Utilization/ or Information Dissemination/ or Evaluation Utilization/ or exp Knowledge Management/ or exp "Adoption (Ideas)"/ or exp Information Transfer/ or exp Technology Transfer/ or Decision Making/) and Evidence/                                                                                                                           | 364     |
| <b>2</b>  | Change Agents/ or Leaders/ or Capacity Building/ or Leadership/ or Role/ or Managerial Occupations/ or Professional Occupations/ or Staff Role/ or Administrator Role/ or Administrators/ or Leadership Role/                                                                                                                                                                                                                                                         | 50717   |
| <b>3</b>  | 1 and 2                                                                                                                                                                                                                                                                                                                                                                                                                                                               | 35      |
| <b>4</b>  | ("know-do" or ((knowledge* or research* or information* or evidence* or science or findings) adj3 (translat* or transfer* or exchange* or action* or practice* or decision* or implement* or manag* or disseminat* or appl* or share* or sharing or uptak* or "use" or utilis* or utiliz* or mobilis* or mobiliz* or integrat* or communicat* or adopt*)) or "technology transfer").mp.                                                                               | 115723  |
| <b>5</b>  | ((((knowledge* or research* or information* or evidence* or science or findings) adj3 (broker* or go-between* or intermediar* or liaison* or mediator* or navigator* or officer* or translator* or facilitator* or leader or leaders)) or (change adj2 agent*) or (boundary adj1 spanner) or (opinion adj1 leader*) or (linkage adj1 agent*) or "researcher-practitioner" or "researcher-practitioners" or (structural adj1 broker*) or (capacity adj1 builder*)).mp. | 9558    |
| <b>6</b>  | 4 and 5                                                                                                                                                                                                                                                                                                                                                                                                                                                               | 1729    |
| <b>7</b>  | (health* or medic* or hospital* or care or therap* or clinic* or doctor* or physician* or nurs* or epidemiolog* or disease* or illness* or infect*).mp. [mp=abstract, title, heading word, identifiers]                                                                                                                                                                                                                                                               | 202213  |
| <b>8</b>  | 3 or 6                                                                                                                                                                                                                                                                                                                                                                                                                                                                | 1756    |
| <b>9</b>  | 7 and 8                                                                                                                                                                                                                                                                                                                                                                                                                                                               | 188     |
| <b>10</b> | ((knowledge adj3 broker*) or (knowledge adj1 manager*)).mp.                                                                                                                                                                                                                                                                                                                                                                                                           | 74      |
| <b>11</b> | 9 or 10                                                                                                                                                                                                                                                                                                                                                                                                                                                               | 256     |
| <b>12</b> | limit 11 to yr="2014 -Current"                                                                                                                                                                                                                                                                                                                                                                                                                                        | 4       |

## Scopus

| # | Query                                                                                                                                                                                                                                                                                                                                                                                                                                                                                                                                                                                                                                                                                                                                                                                    | Results    |
|---|------------------------------------------------------------------------------------------------------------------------------------------------------------------------------------------------------------------------------------------------------------------------------------------------------------------------------------------------------------------------------------------------------------------------------------------------------------------------------------------------------------------------------------------------------------------------------------------------------------------------------------------------------------------------------------------------------------------------------------------------------------------------------------------|------------|
| 1 | TITLE({know-do} OR ((knowledge* OR research* OR information* OR evidence* OR science OR findings) W/2 (translat* OR transfer* OR exchange* OR action* OR practice* OR decision* OR implement* OR manag* OR disseminat* OR appl* OR share* OR sharing OR uptak* OR "use" OR utilis* OR utiliz* OR mobilis* OR mobiliz* OR integrat* OR communicat* OR adopt*)) OR (technology W/0 transfer)) OR KEY({know-do} OR ((knowledge* OR research* OR information* OR evidence* OR science OR findings) W/2 (translat* OR transfer* OR exchange* OR action* OR practice* OR decision* OR implement* OR manag* OR disseminat* OR appl* OR share* OR sharing OR uptak* OR "use" OR utilis* OR utiliz* OR mobilis* OR mobiliz* OR integrat* OR communicat* OR adopt*)) OR (technology W/0 transfer)) | 785,392    |
| 2 | TITLE-ABS-KEY(((knowledge* OR research* OR information* OR evidence* OR science OR findings) W/3 (broker* OR go-between* OR intermediar* OR liaison* OR mediator* OR navigator* OR officer* OR translator* OR facilitator* OR leader OR leaders)) OR (change W/1 agent*) OR (boundary W/0 spanner) OR (opinion W/0 leader*) OR (linkage W/0 agent*) OR {researcher-practitioner} OR {researcher-practitioners} OR (structural W/0 broker*) OR (capacity W/0 builder*))                                                                                                                                                                                                                                                                                                                   | 21,329     |
| 3 | #1 AND #2                                                                                                                                                                                                                                                                                                                                                                                                                                                                                                                                                                                                                                                                                                                                                                                | 4,080      |
| 4 | TITLE-ABS-KEY((knowledge W/2 broker*) OR (knowledge W/0 manager*))                                                                                                                                                                                                                                                                                                                                                                                                                                                                                                                                                                                                                                                                                                                       | 1,045      |
| 5 | #3 OR #4                                                                                                                                                                                                                                                                                                                                                                                                                                                                                                                                                                                                                                                                                                                                                                                 | 4,855      |
| 6 | TITLE-ABS-KEY(health* OR medic* OR hospital* OR care OR therap* OR clinic* OR doctor* OR physician* OR nurs* OR epidemiolog* OR disease* OR illness* OR infect*)                                                                                                                                                                                                                                                                                                                                                                                                                                                                                                                                                                                                                         | 16,611,101 |
| 7 | #5 AND #6                                                                                                                                                                                                                                                                                                                                                                                                                                                                                                                                                                                                                                                                                                                                                                                | 1,805      |
| 8 | 7 AND ( LIMIT-TO ( PUBYEAR , 2015 ) OR LIMIT-TO ( PUBYEAR , 2014 ) ) AND ( LIMIT-TO ( LANGUAGE , "English" ) )                                                                                                                                                                                                                                                                                                                                                                                                                                                                                                                                                                                                                                                                           | 129        |

## SocINDEX with Full Text

| #  | Query     | Limiters/Expanders                                                                                                                                                                                                                                                                      | Results |
|----|-----------|-----------------------------------------------------------------------------------------------------------------------------------------------------------------------------------------------------------------------------------------------------------------------------------------|---------|
| S8 | S5 NOT S6 | Limiters - Date of Publication: 20140101-20141231<br>Search modes - Boolean/Phrase                                                                                                                                                                                                      | 22      |
| S7 | S5 NOT S6 | Search modes - Boolean/Phrase                                                                                                                                                                                                                                                           | 831     |
| S6 | S3 OR S4  | Limiters - Language: Afrikaans, Catalan, Chinese, Croatian, Czech, Danish, Dutch/Flemish, Finnish, French, German, Galician, Hungarian, Italian, Japanese, Lithuanian, Norwegian, Polish, Portuguese, Romanian, Russian, Slovak, Slovenian, Spanish, Swedish, Turkish<br>Search modes - | 13      |

|           |                                                                                                                                                                                                                                                                                                                                                                                                                                                  |                                  |         |
|-----------|--------------------------------------------------------------------------------------------------------------------------------------------------------------------------------------------------------------------------------------------------------------------------------------------------------------------------------------------------------------------------------------------------------------------------------------------------|----------------------------------|---------|
|           |                                                                                                                                                                                                                                                                                                                                                                                                                                                  | Boolean/Phrase                   |         |
| <b>S5</b> | S3 OR S4                                                                                                                                                                                                                                                                                                                                                                                                                                         | Search modes -<br>Boolean/Phrase | 844     |
| <b>S4</b> | (knowledge N3 broker*) OR (knowledge N0 manager*)                                                                                                                                                                                                                                                                                                                                                                                                | Search modes -<br>Boolean/Phrase | 104     |
| <b>S3</b> | S1 AND S2                                                                                                                                                                                                                                                                                                                                                                                                                                        | Search modes -<br>Boolean/Phrase | 781     |
| <b>S2</b> | ((knowledge* or research* or information* or evidence* or science or findings) N2 (broker* or go-between* or intermediar* or liaison* or mediator* or navigator* or officer* or translator* or facilitator* or leader or leaders)) or (change N1 agent*) or (boundary N0 spanner) or (opinion N0 leader*) or (linkage N0 agent*) or "researcher-practitioner" or "researcher-practitioners" or (structural N0 broker*) or (capacity N0 builder*) | Search modes -<br>Boolean/Phrase | 4,888   |
| <b>S1</b> | "know-do" or ((knowledge* or research* or information* or evidence* or science or findings) N2 (translat* or transfer* or exchange* or action* or practice* or decision* or implement* or manag* or disseminat* or appl* or share* or sharing or uptak* or "use" or utilis* or utiliz* or mobilis* or mobiliz* or integrat* or communicat* or adopt*)) or "technology transfer"                                                                  | Search modes -<br>Boolean/Phrase | 104,663 |

#### Health Business Elite

|           | Query                                                                                                                                                                                                          | Limiters/Expanders                                                                      | Results |
|-----------|----------------------------------------------------------------------------------------------------------------------------------------------------------------------------------------------------------------|-----------------------------------------------------------------------------------------|---------|
| <b>S8</b> | S5 OR S6                                                                                                                                                                                                       | Limiters - Published<br>Date: 20140101-<br>20141231<br>Search modes -<br>Boolean/Phrase | 46      |
| <b>S7</b> | S5 OR S6                                                                                                                                                                                                       | Search modes -<br>Boolean/Phrase                                                        | 887     |
| <b>S6</b> | (knowledge N3 broker*) OR (knowledge N0 manager*)                                                                                                                                                              | Search modes -<br>Boolean/Phrase                                                        | 121     |
| <b>S5</b> | S3 AND S4                                                                                                                                                                                                      | Search modes -<br>Boolean/Phrase                                                        | 769     |
| <b>S4</b> | health* OR medic* OR hospital* OR care OR therap* OR clinic* OR doctor* OR physician* OR nurs* OR epidemiolog* OR disease* OR illness* OR infect*                                                              | Search modes -<br>Boolean/Phrase                                                        | 783,564 |
| <b>S3</b> | S1 AND S2                                                                                                                                                                                                      | Search modes -<br>Boolean/Phrase                                                        | 3,109   |
| <b>S2</b> | ((knowledge* or research* or information* or evidence* or science or findings) N2 (broker* or go-between* or intermediar* or liaison* or mediator* or navigator* or officer* or translator* or facilitator* or | Search modes -<br>Boolean/Phrase                                                        | 17,949  |

|    |                                                                                                                                                                                                                                                                                                                                                                                |                               |         |
|----|--------------------------------------------------------------------------------------------------------------------------------------------------------------------------------------------------------------------------------------------------------------------------------------------------------------------------------------------------------------------------------|-------------------------------|---------|
|    | leader or leaders)) or (change N1 agent*) or (boundary NO spanner) or (opinion NO leader*) or (linkage NO agent*) or "researcher-practitioner" or "researcher-practitioners" or (structural NO broker*) or (capacity NO builder*)                                                                                                                                              |                               |         |
| S1 | "know-do" or ((knowledge* or research* or information* or evidence* or science or findings) N2 (translat* or transfer* or exchang* or action* or practice* or decision* or implement* or manag* or disseminat* or appl* or share* or sharing or uptak* or "use" or utilis* or utiliz* or mobilis* or mobiliz* or integrat* or communicat* or adopt*)) or "technology transfer" | Search modes - Boolean/Phrase | 108,127 |

### Search yield (January – November 2014):

- Gross yield: 502
  - MEDLINE: 132
  - Embase: 30
  - PsycINFO: 124
  - CINAHL: 15
  - ERIC: 4
  - Scopus: 129
  - SocINDEX: 22
  - Health Business Elite: 46
- Duplicates: 70
- Net yield: 432
