# Supplementary material for: Exploring the function and effectiveness of knowledge brokers as facilitators of knowledge translation in health-related settings: a systematic review and thematic analysis
Source: PubMed Central journal article supplement (PMC4653833; doi:10.1186/s13012-015-0351-9), 2015-11-20
Supplement: 13012_2015_351_MOESM2_ESM.pdf [file 13012_2015_351_MOESM2_ESM.pdf]

# Knowledge brokering review

---

## Databases:

- Grey literature

## Search strings:

("knowledge broker" OR "knowledge brokering" OR "knowledge brokerage") AND (health OR medical OR medicine OR nursing OR care)

"knowledge manager" AND (health OR medical OR medicine OR nursing OR care)

"linkage agent" AND (health OR medical OR medicine OR nursing OR care) AND (knowledge-translation OR knowledge-transfer OR knowledge-management OR knowledge-exchange OR knowledge-practice OR knowledge-action OR knowledge-utilization OR knowledge-sharing OR knowledge-mobilization)

"capacity builder" AND (health OR medical OR medicine OR nursing OR care) AND (knowledge-translation OR knowledge-transfer OR knowledge-management OR knowledge-exchange OR knowledge-practice OR knowledge-action OR knowledge-utilization OR knowledge-sharing OR knowledge-mobilization)

## Custom search engines:

Custom Search Engine for Ontario Public Health Unit Websites <http://www.ophla.ca/customsearch.htm>

Custom Search Engine for Canadian Public Health Information <http://www.ophla.ca/customsearchcanada.htm>

## Core sources:

National Collaborating Centre for Methods and Tools <http://www.nccmt.ca/>

Canadian Foundation for Healthcare Improvement (formerly the Canadian Health Services Research Foundation) <http://www.cfhi-fcass.ca/>

Health Evidence <http://www.healthevidence.org/>

Canadian Institutes of Health Research <http://www.cihr-irsc.gc.ca/>

World Health Organization <http://www.who.int/>

WHO Regional Office for Europe <http://www.euro.who.int/>

See: [BRIDGE](#) (Brokering knowledge and Research Information to support the Development and Governance of health systems in Europe) policy brief and summary series

## Knowledge Brokering Review – Grey Literature Search Results

| SOURCE                                                                                                                                                  | SEARCH STRING                                                                                                                                                                                                                                                                               | SOURCES RETRIEVED | APPLICABLE LINKS                                                                                                                                                                                                                                                                                                                                                                                                                                                                                                                                                                                                       |
|---------------------------------------------------------------------------------------------------------------------------------------------------------|---------------------------------------------------------------------------------------------------------------------------------------------------------------------------------------------------------------------------------------------------------------------------------------------|-------------------|------------------------------------------------------------------------------------------------------------------------------------------------------------------------------------------------------------------------------------------------------------------------------------------------------------------------------------------------------------------------------------------------------------------------------------------------------------------------------------------------------------------------------------------------------------------------------------------------------------------------|
| <b>GREY LITERATURE</b>                                                                                                                                  |                                                                                                                                                                                                                                                                                             |                   |                                                                                                                                                                                                                                                                                                                                                                                                                                                                                                                                                                                                                        |
| Custom Search Engine for Ontario Public Health Unit Websites<br><a href="http://www.ophla.ca/customsearch.htm">http://www.ophla.ca/customsearch.htm</a> | ("knowledge broker" OR "knowledge brokering" OR "knowledge brokerage") AND (health OR medical OR medicine OR nursing OR care)                                                                                                                                                               | 21                | 3 articles applicable for screening<br><br><a href="http://www.ottawa.ca/calendar/ottawa/citycouncil/cpsc/2010/02-04/04%20-%20CURE_NPI_Final_Report_20081.pdf">http://www.ottawa.ca/calendar/ottawa/citycouncil/cpsc/2010/02-04/04%20-%20CURE_NPI_Final_Report_20081.pdf</a><br><br><a href="http://archives.york.ca/council/committeearchives/pdf/rpt%2010%20cls%208-7.pdf">http://archives.york.ca/council/committeearchives/pdf/rpt%2010%20cls%208-7.pdf</a><br><br><a href="http://www.chnc.ca/documents/2009_conference/2009_A2_Fernane.pdf">http://www.chnc.ca/documents/2009_conference/2009_A2_Fernane.pdf</a> |
|                                                                                                                                                         | "knowledge manager" AND (health OR medical OR medicine OR nursing OR care)                                                                                                                                                                                                                  | 1                 | 0 applicable for screening                                                                                                                                                                                                                                                                                                                                                                                                                                                                                                                                                                                             |
|                                                                                                                                                         | "linkage agent" AND (health OR medical OR medicine OR nursing OR care) AND (knowledge-translation OR knowledge-transfer OR knowledge-management OR knowledge-exchange OR knowledge-practice OR knowledge-action OR knowledge-utilization OR knowledge-sharing OR knowledge-mobilization)    | 0                 | 0 applicable for screening                                                                                                                                                                                                                                                                                                                                                                                                                                                                                                                                                                                             |
|                                                                                                                                                         | "capacity builder" AND (health OR medical OR medicine OR nursing OR care) AND (knowledge-translation OR knowledge-transfer OR knowledge-management OR knowledge-exchange OR knowledge-practice OR knowledge-action OR knowledge-utilization OR knowledge-sharing OR knowledge-mobilization) | 0                 | 0 applicable for screening                                                                                                                                                                                                                                                                                                                                                                                                                                                                                                                                                                                             |
| Custom Search Engine for Canadian Public Health Information<br><a href="http://www.ophla.ca/customsearch.htm">http://www.ophla.ca/customsearch.htm</a>  | ("knowledge broker" OR "knowledge brokering" OR "knowledge brokerage") AND (health OR medical OR medicine OR nursing OR care)                                                                                                                                                               |                   | Eliminated due to poor search stratification                                                                                                                                                                                                                                                                                                                                                                                                                                                                                                                                                                           |

| SOURCE                                                                                                         | SEARCH STRING                                                                                                                                                                                                                                                                               | SOURCES RETRIEVED | APPLICABLE LINKS                                                                                                                                                                                                                                                                                                                                                                                                                                                                                                                                                                                                                                                                                                                                                                                                                                                                                                                         |
|----------------------------------------------------------------------------------------------------------------|---------------------------------------------------------------------------------------------------------------------------------------------------------------------------------------------------------------------------------------------------------------------------------------------|-------------------|------------------------------------------------------------------------------------------------------------------------------------------------------------------------------------------------------------------------------------------------------------------------------------------------------------------------------------------------------------------------------------------------------------------------------------------------------------------------------------------------------------------------------------------------------------------------------------------------------------------------------------------------------------------------------------------------------------------------------------------------------------------------------------------------------------------------------------------------------------------------------------------------------------------------------------------|
| <a href="http://phla.ca/customsearchcanada.htm">phla.ca/customsearchcanada.htm</a>                             |                                                                                                                                                                                                                                                                                             |                   |                                                                                                                                                                                                                                                                                                                                                                                                                                                                                                                                                                                                                                                                                                                                                                                                                                                                                                                                          |
|                                                                                                                | "knowledge manager" AND (health OR medical OR medicine OR nursing OR care)                                                                                                                                                                                                                  |                   | Eliminated due to poor search stratification                                                                                                                                                                                                                                                                                                                                                                                                                                                                                                                                                                                                                                                                                                                                                                                                                                                                                             |
|                                                                                                                | "linkage agent" AND (health OR medical OR medicine OR nursing OR care) AND (knowledge-translation OR knowledge-transfer OR knowledge-management OR knowledge-exchange OR knowledge-practice OR knowledge-action OR knowledge-utilization OR knowledge-sharing OR knowledge-mobilization)    |                   | Eliminated due to poor search stratification                                                                                                                                                                                                                                                                                                                                                                                                                                                                                                                                                                                                                                                                                                                                                                                                                                                                                             |
|                                                                                                                | "capacity builder" AND (health OR medical OR medicine OR nursing OR care) AND (knowledge-translation OR knowledge-transfer OR knowledge-management OR knowledge-exchange OR knowledge-practice OR knowledge-action OR knowledge-utilization OR knowledge-sharing OR knowledge-mobilization) |                   | Eliminated due to poor search stratification                                                                                                                                                                                                                                                                                                                                                                                                                                                                                                                                                                                                                                                                                                                                                                                                                                                                                             |
| National Collaborating Centre for Methods and Tools<br><a href="http://www.nccmt.ca/">http://www.nccmt.ca/</a> | ("knowledge broker" OR "knowledge brokering" OR "knowledge brokerage") AND (health OR medical OR medicine OR nursing OR care)<br><br>Search string 1                                                                                                                                        | 60                | <ol style="list-style-type: none"> <li>1. <a href="http://www.nccmt.ca/register/view/eng/160.html">http://www.nccmt.ca/register/view/eng/160.html</a></li> <li>2. <a href="http://www.nccmt.ca/register/view/eng/167.html">http://www.nccmt.ca/register/view/eng/167.html</a></li> <li>3. <a href="http://www.nccmt.ca/register/view/eng/139.html">http://www.nccmt.ca/register/view/eng/139.html</a></li> <li>4. <a href="http://www.nccmt.ca/register/view/eng/170.html">http://www.nccmt.ca/register/view/eng/170.html</a></li> <li>5. <a href="http://www.nccmt.ca/pubs/transcripts/eiph07_transcript.pdf">http://www.nccmt.ca/pubs/transcripts/eiph07_transcript.pdf</a></li> <li>6. <a href="http://www.nccmt.ca/register/view/eng/204.html">http://www.nccmt.ca/register/view/eng/204.html</a></li> <li>7. <a href="http://www.nccmt.ca/register/view/eng/110.html">http://www.nccmt.ca/register/view/eng/110.html</a></li> </ol> |

| SOURCE                                                                                                                                                                                     | SEARCH STRING                                                                                                                                                                                                                                                                               | SOURCES RETRIEVED | APPLICABLE LINKS                                                                                                                                                                                                                                                                                                                                                                                                                                                                                                                                                                                                                                                                                                                                    |
|--------------------------------------------------------------------------------------------------------------------------------------------------------------------------------------------|---------------------------------------------------------------------------------------------------------------------------------------------------------------------------------------------------------------------------------------------------------------------------------------------|-------------------|-----------------------------------------------------------------------------------------------------------------------------------------------------------------------------------------------------------------------------------------------------------------------------------------------------------------------------------------------------------------------------------------------------------------------------------------------------------------------------------------------------------------------------------------------------------------------------------------------------------------------------------------------------------------------------------------------------------------------------------------------------|
|                                                                                                                                                                                            |                                                                                                                                                                                                                                                                                             |                   | <p>8. <a href="http://www.nccmt.ca/pubs/NCCMT_fall2008.pdf">http://www.nccmt.ca/pubs/NCCMT_fall2008.pdf</a></p> <p>9. <a href="http://www.nccmt.ca/pubs/KMpaper_EN.pdf">http://www.nccmt.ca/pubs/KMpaper_EN.pdf</a></p> <p>10. <a href="http://www.nccmt.ca/pubs/KMforumReport_EN.pdf">http://www.nccmt.ca/pubs/KMforumReport_EN.pdf</a></p>                                                                                                                                                                                                                                                                                                                                                                                                        |
|                                                                                                                                                                                            | "knowledge manager" AND (health OR medical OR medicine OR nursing OR care)                                                                                                                                                                                                                  | 2                 | none                                                                                                                                                                                                                                                                                                                                                                                                                                                                                                                                                                                                                                                                                                                                                |
|                                                                                                                                                                                            | "linkage agent" AND (health OR medical OR medicine OR nursing OR care) AND (knowledge-translation OR knowledge-transfer OR knowledge-management OR knowledge-exchange OR knowledge-practice OR knowledge-action OR knowledge-utilization OR knowledge-sharing OR knowledge-mobilization)    | 0                 |                                                                                                                                                                                                                                                                                                                                                                                                                                                                                                                                                                                                                                                                                                                                                     |
|                                                                                                                                                                                            | "capacity builder" AND (health OR medical OR medicine OR nursing OR care) AND (knowledge-translation OR knowledge-transfer OR knowledge-management OR knowledge-exchange OR knowledge-practice OR knowledge-action OR knowledge-utilization OR knowledge-sharing OR knowledge-mobilization) | 0                 |                                                                                                                                                                                                                                                                                                                                                                                                                                                                                                                                                                                                                                                                                                                                                     |
| <p>Canadian Foundation for Healthcare Improvement (formerly the Canadian Health Services Research Foundation)</p> <p><a href="http://www.cfhi-fcass.ca/">http://www.cfhi-fcass.ca/</a></p> | ("knowledge broker" OR "knowledge brokering" OR "knowledge brokerage") AND (health OR medical OR medicine OR nursing OR care)                                                                                                                                                               | 19                | <p>1. <a href="http://www.cfhi-fcass.ca/sf-docs/default-source/reports/KnowledgeBrokeringReview-EN.pdf">http://www.cfhi-fcass.ca/sf-docs/default-source/reports/KnowledgeBrokeringReview-EN.pdf</a></p> <p>2. <a href="http://www.cfhi-fcass.ca/Migrated/PDF/InsightAction/insight_action27_e.pdf">http://www.cfhi-fcass.ca/Migrated/PDF/InsightAction/insight_action27_e.pdf</a></p> <p>3. <a href="http://www.cfhi-fcass.ca/Migrated/PDF/InsightAction/insight_action22_e.pdf">http://www.cfhi-fcass.ca/Migrated/PDF/InsightAction/insight_action22_e.pdf</a></p> <p>4. <a href="http://www.cfhi-fcass.ca/Migrated/PDF/InsightAction/InsightandAction42f.pdf">http://www.cfhi-fcass.ca/Migrated/PDF/InsightAction/InsightandAction42f.pdf</a></p> |

| SOURCE                                                                                         | SEARCH STRING                                                                                                                                                                                                                                                                               | SOURCES RETRIEVED | APPLICABLE LINKS                                                                                                                                                         |
|------------------------------------------------------------------------------------------------|---------------------------------------------------------------------------------------------------------------------------------------------------------------------------------------------------------------------------------------------------------------------------------------------|-------------------|--------------------------------------------------------------------------------------------------------------------------------------------------------------------------|
|                                                                                                |                                                                                                                                                                                                                                                                                             |                   | 5. <a href="http://www.cfhi-fcass.ca/Migrated/PDF/InsightAction/insight%20action23_e.pdf">http://www.cfhi-fcass.ca/Migrated/PDF/InsightAction/insight action23 e.pdf</a> |
|                                                                                                | "knowledge manager" AND (health OR medical OR medicine OR nursing OR care)                                                                                                                                                                                                                  | 1                 | none                                                                                                                                                                     |
|                                                                                                | "linkage agent" AND (health OR medical OR medicine OR nursing OR care) AND (knowledge-translation OR knowledge-transfer OR knowledge-management OR knowledge-exchange OR knowledge-practice OR knowledge-action OR knowledge-utilization OR knowledge-sharing OR knowledge-mobilization)    | 0                 |                                                                                                                                                                          |
|                                                                                                | "capacity builder" AND (health OR medical OR medicine OR nursing OR care) AND (knowledge-translation OR knowledge-transfer OR knowledge-management OR knowledge-exchange OR knowledge-practice OR knowledge-action OR knowledge-utilization OR knowledge-sharing OR knowledge-mobilization) | 0                 |                                                                                                                                                                          |
| Health Evidence<br><a href="http://www.healthevidence.org/">http://www.healthevidence.org/</a> | ("knowledge broker" OR "knowledge brokering" OR "knowledge brokerage") AND (health OR medical OR medicine OR nursing OR care)                                                                                                                                                               | 1                 | 1. <a href="http://www.healthevidence.org/view-article.aspx?a=23166">http://www.healthevidence.org/view-article.aspx?a=23166</a>                                         |
|                                                                                                | "knowledge manager" AND (health OR medical OR medicine OR nursing OR care)                                                                                                                                                                                                                  | 0                 |                                                                                                                                                                          |
|                                                                                                | "linkage agent" AND (health OR medical OR medicine OR nursing OR care) AND (knowledge-translation OR knowledge-transfer OR knowledge-management OR knowledge-exchange OR knowledge-practice OR knowledge-action OR knowledge-utilization OR knowledge-sharing OR knowledge-mobilization)    | 0                 |                                                                                                                                                                          |
|                                                                                                | "capacity builder" AND (health OR medical OR medicine OR nursing OR care) AND (knowledge-translation OR knowledge-transfer OR knowledge-management OR knowledge-exchange OR knowledge-practice OR knowledge-action OR knowledge-                                                            | 0                 |                                                                                                                                                                          |

| SOURCE                                                                                                              | SEARCH STRING                                                                                                                                                                                                                                                                           | SOURCES RETRIEVED | APPLICABLE LINKS                                                                                                                                                                                                                                                                                                                                                                                                                                                                                                                                                                                                                                                                                                                                                                                                                                                                                                                                                                                                                                                                                                                                                                                                                                                                                           |
|---------------------------------------------------------------------------------------------------------------------|-----------------------------------------------------------------------------------------------------------------------------------------------------------------------------------------------------------------------------------------------------------------------------------------|-------------------|------------------------------------------------------------------------------------------------------------------------------------------------------------------------------------------------------------------------------------------------------------------------------------------------------------------------------------------------------------------------------------------------------------------------------------------------------------------------------------------------------------------------------------------------------------------------------------------------------------------------------------------------------------------------------------------------------------------------------------------------------------------------------------------------------------------------------------------------------------------------------------------------------------------------------------------------------------------------------------------------------------------------------------------------------------------------------------------------------------------------------------------------------------------------------------------------------------------------------------------------------------------------------------------------------------|
|                                                                                                                     | utilization OR knowledge-sharing OR knowledge-mobilization)                                                                                                                                                                                                                             |                   |                                                                                                                                                                                                                                                                                                                                                                                                                                                                                                                                                                                                                                                                                                                                                                                                                                                                                                                                                                                                                                                                                                                                                                                                                                                                                                            |
| Canadian Institutes of Health Research<br><br><a href="http://www.cihr-irsc.gc.ca/">http://www.cihr-irsc.gc.ca/</a> | ("knowledge broker" OR "knowledge brokering" OR "knowledge brokerage") AND (health OR medical OR medicine OR nursing OR care)                                                                                                                                                           | 28                | <ol style="list-style-type: none"> <li>1. <a href="http://www.cihr-irsc.gc.ca/e/30673.html">http://www.cihr-irsc.gc.ca/e/30673.html</a></li> <li>2. <a href="http://www.cihr-irsc.gc.ca/e/45321.html">http://www.cihr-irsc.gc.ca/e/45321.html</a></li> <li>3. <a href="http://www.cihr-irsc.gc.ca/e/41594.html">http://www.cihr-irsc.gc.ca/e/41594.html</a></li> <li>4. <a href="http://www.cihr-irsc.gc.ca/e/47630.html">http://www.cihr-irsc.gc.ca/e/47630.html</a></li> <li>5. <a href="http://www.cihr-irsc.gc.ca/e/documents/icr_quality_cancer_care_workshop_e.pdf">http://www.cihr-irsc.gc.ca/e/documents/icr_quality_cancer_care_workshop_e.pdf</a></li> <li>6. <a href="http://www.cihr-irsc.gc.ca/e/documents/icr_palliative_care_summary_e.pdf">http://www.cihr-irsc.gc.ca/e/documents/icr_palliative_care_summary_e.pdf</a></li> <li>7. <a href="http://www.cihr-irsc.gc.ca/e/documents/What_a_Difference_Sex_and_Gender_Make-en.pdf">http://www.cihr-irsc.gc.ca/e/documents/What_a_Difference_Sex_and_Gender_Make-en.pdf</a></li> <li>8. <a href="http://www.cihr-irsc.gc.ca/e/42208.html">http://www.cihr-irsc.gc.ca/e/42208.html</a></li> <li>9. <a href="http://www.cihr-irsc.gc.ca/e/documents/ce_handbook_e.pdf">http://www.cihr-irsc.gc.ca/e/documents/ce_handbook_e.pdf</a></li> </ol> |
|                                                                                                                     | "knowledge manager" AND (health OR medical OR medicine OR nursing OR care)                                                                                                                                                                                                              | 0                 |                                                                                                                                                                                                                                                                                                                                                                                                                                                                                                                                                                                                                                                                                                                                                                                                                                                                                                                                                                                                                                                                                                                                                                                                                                                                                                            |
|                                                                                                                     | "linkage agent" AND (health OR medical OR medicine OR nursing OR care) AND (knowledge-translation OR knowledge-transfer OR knowledge-management OR knowledge-exchange OR knowledge-practice OR knowledge-action OR knowledge-utilization OR knowledge-sharing OR knowledge-mobilization | 0                 |                                                                                                                                                                                                                                                                                                                                                                                                                                                                                                                                                                                                                                                                                                                                                                                                                                                                                                                                                                                                                                                                                                                                                                                                                                                                                                            |
|                                                                                                                     | "capacity builder" AND (health OR medical OR medicine OR nursing OR care) AND (knowledge-translation OR knowledge-transfer OR knowledge-management OR knowledge-exchange OR knowledge-practice OR knowledge-action OR knowledge-utilization OR knowledge-sharing OR                     | 0                 |                                                                                                                                                                                                                                                                                                                                                                                                                                                                                                                                                                                                                                                                                                                                                                                                                                                                                                                                                                                                                                                                                                                                                                                                                                                                                                            |

| SOURCE                                                                             | SEARCH STRING                                                                                                                                            | SOURCES RETRIEVED | APPLICABLE LINKS                                                                                                                                                                                                                                                                                                                                                                                                                                                                                                                                                                                                                                                                                                                                                                                                                                                                                                                                                                                                                                                                                                                                                                                                                                                                                                                                                                                                                                                                                                                         |
|------------------------------------------------------------------------------------|----------------------------------------------------------------------------------------------------------------------------------------------------------|-------------------|------------------------------------------------------------------------------------------------------------------------------------------------------------------------------------------------------------------------------------------------------------------------------------------------------------------------------------------------------------------------------------------------------------------------------------------------------------------------------------------------------------------------------------------------------------------------------------------------------------------------------------------------------------------------------------------------------------------------------------------------------------------------------------------------------------------------------------------------------------------------------------------------------------------------------------------------------------------------------------------------------------------------------------------------------------------------------------------------------------------------------------------------------------------------------------------------------------------------------------------------------------------------------------------------------------------------------------------------------------------------------------------------------------------------------------------------------------------------------------------------------------------------------------------|
| World Health Organization<br><a href="http://www.who.int/">http://www.who.int/</a> | knowledge-mobilization)<br>("knowledge broker" OR "knowledge brokering" OR "knowledge brokerage") AND (health OR medical OR medicine OR nursing OR care) | 187               | <b>12 articles applicable for screening</b><br><br>1.<br><a href="http://www.who.int/bulletin/volumes/84/8/05-028308.pdf">http://www.who.int/bulletin/volumes/84/8/05-028308.pdf</a><br><br>2.<br><a href="http://www.who.int/workforcealliance/knowledge/publications/alliance/2009KnowledgeStrat.pdf">http://www.who.int/workforcealliance/knowledge/publications/alliance/2009KnowledgeStrat.pdf</a><br><br>3.<br><a href="http://www.who.int/bulletin/volumes/85/5/06-037663/en/">http://www.who.int/bulletin/volumes/85/5/06-037663/en/</a><br><br>4.<br><a href="http://applications.emro.who.int/dsaf/dsa999.pdf">http://applications.emro.who.int/dsaf/dsa999.pdf</a><br><br>5.<br><a href="http://www.who.int/kms/WHO_EIP_KMS_2006_2.pdf">http://www.who.int/kms/WHO_EIP_KMS_2006_2.pdf</a><br><br>6.<br><a href="http://www.who.int/rpc/publications/scaling_up_research.pdf">http://www.who.int/rpc/publications/scaling_up_research.pdf</a><br><br>7.<br><a href="http://www.who.int/workforcealliance/knowledge/publications/alliance/2009ComStrat_webversion.pdf">http://www.who.int/workforcealliance/knowledge/publications/alliance/2009ComStrat_webversion.pdf</a><br><br>8.<br><a href="http://www.who.int/alliance-hpsr/TR1Healy.pdf">http://www.who.int/alliance-hpsr/TR1Healy.pdf</a><br><br>9.<br><a href="http://www.who.int/workforcealliance/knowledge/publications/alliance/2009ComStrat_webversion.pdf">http://www.who.int/workforcealliance/knowledge/publications/alliance/2009ComStrat_webversion.pdf</a> |

| SOURCE                                                                                                                     | SEARCH STRING                                                                                                                                                                                                                                                                               | SOURCES RETRIEVED                                                                       | APPLICABLE LINKS                                                                                                                                                                                                                                                                                                                                                                                                                                                                               |
|----------------------------------------------------------------------------------------------------------------------------|---------------------------------------------------------------------------------------------------------------------------------------------------------------------------------------------------------------------------------------------------------------------------------------------|-----------------------------------------------------------------------------------------|------------------------------------------------------------------------------------------------------------------------------------------------------------------------------------------------------------------------------------------------------------------------------------------------------------------------------------------------------------------------------------------------------------------------------------------------------------------------------------------------|
|                                                                                                                            |                                                                                                                                                                                                                                                                                             |                                                                                         | <a href="#">ations/taskforces/refgroup_report2010.pdf</a><br>10. <a href="http://www.who.int/bulletin/volumes/87/5/08-058024.pdf">http://www.who.int/bulletin/volumes/87/5/08-058024.pdf</a><br>11. <a href="http://whqlibdoc.who.int/publications/2009/9789241598033_eng.pdf">http://whqlibdoc.who.int/publications/2009/9789241598033_eng.pdf</a><br>12. <a href="http://www.wpro.who.int/asia_pacific_observatory/about/en/">http://www.wpro.who.int/asia_pacific_observatory/about/en/</a> |
|                                                                                                                            | "knowledge manager" AND (health OR medical OR medicine OR nursing OR care)                                                                                                                                                                                                                  | 4                                                                                       | 0 applicable for screening                                                                                                                                                                                                                                                                                                                                                                                                                                                                     |
|                                                                                                                            | "linkage agent" AND (health OR medical OR medicine OR nursing OR care) AND (knowledge-translation OR knowledge-transfer OR knowledge-management OR knowledge-exchange OR knowledge-practice OR knowledge-action OR knowledge-utilization OR knowledge-sharing OR knowledge-mobilization)    | 0                                                                                       | 0 applicable for screening                                                                                                                                                                                                                                                                                                                                                                                                                                                                     |
|                                                                                                                            | "capacity builder" AND (health OR medical OR medicine OR nursing OR care) AND (knowledge-translation OR knowledge-transfer OR knowledge-management OR knowledge-exchange OR knowledge-practice OR knowledge-action OR knowledge-utilization OR knowledge-sharing OR knowledge-mobilization) | 2                                                                                       | <b>1 article applicable for screening</b><br>13. <a href="http://www.who.int/alliance-hpsr/TR1Healy.pdf">http://www.who.int/alliance-hpsr/TR1Healy.pdf</a>                                                                                                                                                                                                                                                                                                                                     |
| WHO Regional Office for Europe<br>See: <a href="#">BRIDGE</a> (Brokering knowledge and Research Information to support the | ("knowledge broker" OR "knowledge brokering" OR "knowledge brokerage") AND (health OR medical OR medicine OR nursing OR care)                                                                                                                                                               | 10 unique sources (between 61-70 total sources; could not determine specific value. Was | <a href="http://www.euro.who.int/en/about-us/partners/observatory/bridge-series">http://www.euro.who.int/en/about-us/partners/observatory/bridge-series</a><br><b>5 articles applicable for screening</b><br>1.                                                                                                                                                                                                                                                                                |



| SOURCE                                                                                                                                                                | SEARCH STRING                                                                                                                                                                                                                                                    | SOURCES RETRIEVED   | APPLICABLE LINKS                                                                                                                                                                                                                                                                                                                                                                                                                                                                                                                                                                                                                                                                                                                                                                                                                                                                                                                                                                                                                                                                                                                                                                                                                                                                                                                                                                                                   |
|-----------------------------------------------------------------------------------------------------------------------------------------------------------------------|------------------------------------------------------------------------------------------------------------------------------------------------------------------------------------------------------------------------------------------------------------------|---------------------|--------------------------------------------------------------------------------------------------------------------------------------------------------------------------------------------------------------------------------------------------------------------------------------------------------------------------------------------------------------------------------------------------------------------------------------------------------------------------------------------------------------------------------------------------------------------------------------------------------------------------------------------------------------------------------------------------------------------------------------------------------------------------------------------------------------------------------------------------------------------------------------------------------------------------------------------------------------------------------------------------------------------------------------------------------------------------------------------------------------------------------------------------------------------------------------------------------------------------------------------------------------------------------------------------------------------------------------------------------------------------------------------------------------------|
| <p>Development and Governance of health systems in Europe) policy brief and summary series</p> <p><a href="http://www.euro.who.int/">http://www.euro.who.int/</a></p> |                                                                                                                                                                                                                                                                  | not listed on site) | <p><a href="http://www.euro.who.int/data/assets/pdf_file/0004/195232/Obs-Policy-Brief-17,-How-can-knowledge-brokering-be-advanced-in-a-countrys-health-system.pdf">http://www.euro.who.int/data/assets/pdf_file/0004/195232/Obs-Policy-Brief-17,-How-can-knowledge-brokering-be-advanced-in-a-countrys-health-system.pdf</a></p> <p>2. <a href="http://www.euro.who.int/en/about-us/partners/observatory/bridge-series/how-can-knowledge-brokering-be-better-supported-across-european-health-systems">http://www.euro.who.int/en/about-us/partners/observatory/bridge-series/how-can-knowledge-brokering-be-better-supported-across-european-health-systems</a></p> <p>3. <a href="http://www.euro.who.int/data/assets/pdf_file/0007/195235/Obs-Policy-Summary-9,-Matching-form-to-function.pdf">http://www.euro.who.int/data/assets/pdf_file/0007/195235/Obs-Policy-Summary-9,-Matching-form-to-function.pdf</a></p> <p>4. <a href="http://www.euro.who.int/data/assets/pdf_file/0006/195234/Obs-Policy-Summary-8,-Learning-from-one-another.pdf">http://www.euro.who.int/data/assets/pdf_file/0006/195234/Obs-Policy-Summary-8,-Learning-from-one-another.pdf</a></p> <p>5. <a href="http://www.euro.who.int/data/assets/pdf_file/0005/195233/Obs-Policy-Summary-7,-Communicating-clearly.pdf">http://www.euro.who.int/data/assets/pdf_file/0005/195233/Obs-Policy-Summary-7,-Communicating-clearly.pdf</a></p> |
|                                                                                                                                                                       | "knowledge manager" AND (health OR medical OR medicine OR nursing OR care)                                                                                                                                                                                       | 2                   | 0 applicable for screening                                                                                                                                                                                                                                                                                                                                                                                                                                                                                                                                                                                                                                                                                                                                                                                                                                                                                                                                                                                                                                                                                                                                                                                                                                                                                                                                                                                         |
|                                                                                                                                                                       | "linkage agent" AND (health OR medical OR medicine OR nursing OR care) AND (knowledge-translation OR knowledge-transfer OR knowledge-management OR knowledge-exchange OR knowledge-practice OR knowledge-action OR knowledge-utilization OR knowledge-sharing OR | 0                   | 0 applicable for screening                                                                                                                                                                                                                                                                                                                                                                                                                                                                                                                                                                                                                                                                                                                                                                                                                                                                                                                                                                                                                                                                                                                                                                                                                                                                                                                                                                                         |

| SOURCE | SEARCH STRING                                                                                                                                                                                                                                                                               | SOURCES RETRIEVED                                    | APPLICABLE LINKS                                 |
|--------|---------------------------------------------------------------------------------------------------------------------------------------------------------------------------------------------------------------------------------------------------------------------------------------------|------------------------------------------------------|--------------------------------------------------|
|        | knowledge-mobilization                                                                                                                                                                                                                                                                      |                                                      |                                                  |
|        | "capacity builder" AND (health OR medical OR medicine OR nursing OR care) AND (knowledge-translation OR knowledge-transfer OR knowledge-management OR knowledge-exchange OR knowledge-practice OR knowledge-action OR knowledge-utilization OR knowledge-sharing OR knowledge-mobilization) | 2                                                    | 0 applicable for screening                       |
|        |                                                                                                                                                                                                                                                                                             | <b>340 documents underwent preliminary screening</b> | <b>46 documents retained after pre-screening</b> |

### November 2014 results provided by Library Services:

1. Kujbida G, Stratton J. Effective knowledge translation tactics for increasing the use of health status and surveillance data. Brampton, ON: Region of Peel; 2014. Available from: <http://www.peelregion.ca/health/library/pdf/effective-kt.pdf>
2. Bronwynne W, Bergen A. Where do knowledge brokers come from? Presented at 2014 Canadian Knowledge Mobilization Forum. Guelph, ON: University of Guelph; 2014. Available from: <http://www.knowledgemobilization.net/archives/7673>
3. Child Development & Rehabilitation. Knowledge broker resources [Internet]. Children's & Women's Health Centre of British Columbia; 2014. Available from: <http://www.childdevelopment.ca/Evidencecentre/KnowledgeBrokering.aspx>
4. Canadian Institutes of Health Research. More about knowledge translation at CIHR [Internet]. CIHR; 2014. Available from: <http://www.cihr-irsc.gc.ca/e/39033.html>
5. National Collaborating Centre for Healthy Public Policy. Health impact assessment of the Tod Neighbourhood Project in Sainte-Catherine. Report on potential impacts and recommendations. Section 2.1: Knowledge-brokering strategy applied to HIA. Montreal, Quebec: National Collaborating Centre for Healthy Public Policy; 2014. Available from: [http://www.ncchpp.ca/docs/2014\\_EnvBati\\_BuiltEnv\\_CLASP\\_HIA\\_SteCatherine\\_EN\\_Gabarit\\_Lig ht.pdf](http://www.ncchpp.ca/docs/2014_EnvBati_BuiltEnv_CLASP_HIA_SteCatherine_EN_Gabarit_Lig ht.pdf)
6. Philips D. Mobilize This! Step by step knowledge brokering. ResearchImpact; 2014. Available from: <http://researchimpact.ca/step-by-step-knowledge-brokering-le-courtage-des-connaissances-pas-a-pas/>
7. Watters N, Kolapak S. Sparking connections: Knowledge Exchange Centre interim report webinar. Mental Health Commission of Canada; 2014. Available from:

[http://www.mentalhealthcommission.ca/English/system/files/private/document/MHCC\\_KEC\\_SparkingConnections\\_InterimReportWebinar\\_Presentation\\_ENG.pdf](http://www.mentalhealthcommission.ca/English/system/files/private/document/MHCC_KEC_SparkingConnections_InterimReportWebinar_Presentation_ENG.pdf)

8. Australian Science Communicators. Knowledge brokering in Australia: influencing policy and practice –Eve Merton [Internet]. 2014. Available from: <http://2014conf.asc.asn.au/schedule/knowledge-brokering-in-australia-influencing-policy-and-practice-eve-merton/> (includes list of conference papers, a workshop paper, and a diagram on functions of knowledge brokering).
9. Mc Sween E. A knowledge brokering strategy to promote research use in Burkina Faso. 2014. Available from: <http://www.equiperenard.ca/knowledge-brokering-strategy-to-promote-research-use-in-burkina-faso/>
10. Wang D. Activating brokerage: inter-organizational knowledge transfer through skilled return migration. Columbia University; 2014. Available from: [http://isites.harvard.edu/fs/docs/icb.topic1258829.files/WANG-Dan\\_4-21-14\\_Activating%20Brokerage%20-%20Inter-organizational%20knowledge%20transfer%20thru%20skilled%20return%20migration\\_ASQ-2014.pdf](http://isites.harvard.edu/fs/docs/icb.topic1258829.files/WANG-Dan_4-21-14_Activating%20Brokerage%20-%20Inter-organizational%20knowledge%20transfer%20thru%20skilled%20return%20migration_ASQ-2014.pdf)
11. Basaza R, Kinengyere A, Sewankambo N. A national framework for sustainability of health knowledge translation initiatives in Uganda. EVIPNet; 2014. Available from: <http://www.who.int/evidence/sure/frsustainabilityktuganda.pdf>
12. East African Community Health Sector. Knowledge brokers link health research, policy and practice [Internet]. East African Community; 2014. Available from: [http://www.eac.int/health/index.php?option=com\\_content&view=article&id=98&Itemid=147](http://www.eac.int/health/index.php?option=com_content&view=article&id=98&Itemid=147)
13. Lemire N, Souffez K, Laurendeau MC. Facilitating a knowledge translation process: knowledge review and facilitation tool. Gouvernement du Québec; 2013. Available from: [http://www.inspq.qc.ca/pdf/publications/1628\\_FaciliKnowledgeTransProcess.pdf](http://www.inspq.qc.ca/pdf/publications/1628_FaciliKnowledgeTransProcess.pdf)
14. Malinovskyte M, Mothe C, Ruling CC. Knowledge brokerage: towards an integrative conceptual framework. AIMS Association Internationale de Management Strategique. n.d. Available from: <http://www.strategie-aims.com/events/conferences/24-xxiiieme-conference-de-l-aims/communications/3166-knowledge-brokerage-towards-an-integrative-conceptual-framework/download>
15. SATNET Asia. SATNET shares its experience as a knowledge broker with the Regional Open Innovation Forum in Malaysia. SATNET; 2012. Available from: <http://www.satnetasia.org/news03-11-2014b.html>
