# Supplementary material for: Exploring the function and effectiveness of knowledge brokers as facilitators of knowledge translation in health-related settings: a systematic review and thematic analysis
Source: PubMed Central journal article supplement (PMC4653833; doi:10.1186/s13012-015-0351-9), 2015-11-20
Supplement: 13012_2015_351_MOESM3_ESM.pdf [file 13012_2015_351_MOESM3_ESM.pdf]

**Additional File 3. Summary of characteristics from studies investigating the use of knowledge brokers in health-related settings.**

| Study | First author (year) country of first author | Study design                       | KT setting                                         | Purpose of KT initiative                                                                                                           | Duration of KB initiative <sup>1</sup> | KB level of experience <sup>2</sup> | KB Position status      | Approach and number of KBs                                                               | Internal or external KB role |
|-------|---------------------------------------------|------------------------------------|----------------------------------------------------|------------------------------------------------------------------------------------------------------------------------------------|----------------------------------------|-------------------------------------|-------------------------|------------------------------------------------------------------------------------------|------------------------------|
| 1     | Chew et al. [47] (2013) England             | Qualitative; grounded theory       | Academic; mixed healthcare settings                | To improve patient outcomes by adapting research to fit the needs of practice and increasing stakeholder participation in research | Unspecified                            | Novice                              | Full-time               | Multiple independent KBs (n = 7)                                                         | Internal                     |
| 2     | Conklin et al. [15] (2013) Canada           | Mixed methods; multiple case study | Community of practice; government; academic        | To connect stakeholders to improve knowledge exchange to enhance seniors' health                                                   | 5 years                                | Unspecified                         | Unspecified             | Multiple independent KBs (n = 6 in year 4, n = 5 in year 5; years 1-3 = unspecified)     | Internal                     |
| 3     | Hoens et al. [41] (2013) Canada             | Qualitative; case study            | Clinical                                           | To support evidence informed practice in respiratory care                                                                          | 4 years                                | Unspecified                         | Full-time               | Independent KB (n = 1)                                                                   | Unspecified                  |
| 4     | Waqā et al. [35] <sup>1</sup> (2013) Fiji   | Mixed methods; case study          | Academic; government; non-government organizations | To advance evidence-informed policy development to improve eating and physical activity environments                               | 12-18 months                           | Unspecified                         | Full-time and part-time | KB team (n = 1 KB); Other members: research fellow, academic consultant, policy advisors | External                     |
|       | Waqā et al. [34] <sup>1</sup> (2013) Fiji   | Qualitative; case study            | Academic; government; non-government organizations | To advance evidence-informed policy development to improve                                                                         | 3 years                                | Unspecified                         | Full-time and part-time | KB team (n = 1 KB); Other members: research fellow, academic                             | External                     |

|   |                                                |                                    |                                                                           |                                                                                                                |              |             |             |                                   |          |
|---|------------------------------------------------|------------------------------------|---------------------------------------------------------------------------|----------------------------------------------------------------------------------------------------------------|--------------|-------------|-------------|-----------------------------------|----------|
|   |                                                |                                    |                                                                           | eating and physical activity environments                                                                      |              |             |             | consultant, policy advisors       |          |
| 5 | Waring et al. [49] (2013) England              | Qualitative; ethnography           | Clinical                                                                  | To facilitate inter-departmental knowledge exchange in hospital settings                                       | 3 years      | Unspecified | Part-time   | Multiple independent KBs (n = 19) | Internal |
| 6 | Frank et al. [34] (2012) Scotland              | Qualitative; case study            | Academic; public health                                                   | To foster collaborative research among stakeholders to impact policies, programs and practice in public health | 3 years      | Unspecified | Unspecified | KB organization (n = unspecified) | External |
| 7 | Ward et al. [43] (2012) England                | Mixed methods; multiple case study | Primary care                                                              | To assess knowledge exchange within a large mental health organization                                         | 10-15 months | Unspecified | Unspecified | Independent KB (n = 1)            | External |
| 8 | Cameron et al. [44] (2011) <sup>2</sup> Canada | Qualitative; exploratory           | Mixed healthcare settings                                                 | To facilitate use of evidence-based practice among physiotherapists working with children with cerebral palsy  | 6 months     | Unspecified | Unspecified | Multiple independent KBs (n = 28) | Internal |
|   | Rivard et al. [39] (2010) Canada               | Mixed method; descriptive          | Mixed pediatric healthcare facilities (hospitals, rehabilitation centers) | To facilitate the uptake of measurement tools by physiotherapists in pediatric settings                        | 6 months     | Novice      | Part-time   | Multiple independent KBs (n = 24) | Internal |
|   | Russell et al. [52] (2010) Canada              | Mixed methods; longitudinal        | Mixed pediatric healthcare facilities (hospitals, rehabilitation centers) | To facilitate the uptake of measurement tools by physiotherapists in pediatric settings                        | 18 months    | Novice      | Part-time   | Multiple independent KBs (n = 24) | Internal |

|    |                                       |                                  |                                |                                                                                                            |             |                     |                               |                                                             |          |
|----|---------------------------------------|----------------------------------|--------------------------------|------------------------------------------------------------------------------------------------------------|-------------|---------------------|-------------------------------|-------------------------------------------------------------|----------|
| 9  | Campbell et al. [36] (2011) Australia | Qualitative; multiple case study | Government; Academic           | To provide policy makers with rapid, structured reviews of evidence                                        | 3 years     | Experienced         | Part-time                     | KB organization; multiple independent KBs (n = unspecified) | External |
| 10 | Gerrish et al. [45] (2011) England    | Qualitative; case study          | Clinical                       | To understand how advanced practice nurses use and share evidence in practice                              | Unspecified | Unspecified         | Unspecified                   | Multiple independent KBs (n = 23)                           | Internal |
| 11 | Urquhart et al. [29] (2011) Canada    | Qualitative; case study          | Academic; clinical; government | To improve access to quality colorectal cancer care                                                        | 5 years     | Novice              | Full time                     | Independent KB (n = 1)                                      | Internal |
| 12 | Jansson et al. [31] (2010) Canada     | Qualitative; reflection          | Non-government organizations   | To enhance collaborative partnership among stakeholders working with adult persons working in sex industry | Unspecified | Unspecified         | Unspecified                   | Multiple independent KBs (n = 2)                            | Internal |
| 13 | Kimble et al. [40] (2010) France      | Qualitative; multiple case study | Clinical                       | To facilitate knowledge exchange between members of a neurological/ cognitive condition network            | Unspecified | Unspecified         | Unspecified                   | Independent KB (n = 2) <sup>3</sup>                         | Internal |
| 14 | Dobbins et al. [46] (2009) Canada     | Randomized controlled trial      | Public health                  | To facilitate incorporation of research evidence into public health policies and programs                  | 2 years     | Novice <sup>4</sup> | Full-time and part-time staff | Multiple independent KBs (n = 2)                            | External |
|    | Dobbins et al. [21] (2009) Canada     | Qualitative; reflection          | Public health                  | To facilitate incorporation of research evidence into public health policies and programs                  | 2 years     | Novice <sup>4</sup> | Full-time                     | Independent KB (n = 1)                                      | External |
|    | Robeson et al. [38] (2008) Canada     | Qualitative; reflection          | Public health                  | To facilitate incorporation of research evidence into                                                      | 2 years     | Novice <sup>4</sup> | Full-time                     | Independent KB (n = 1)                                      | External |

|    |                                                |                                                    |                                              |                                                                                                                                                                                                          |             |                     |             |                                                             |             |
|----|------------------------------------------------|----------------------------------------------------|----------------------------------------------|----------------------------------------------------------------------------------------------------------------------------------------------------------------------------------------------------------|-------------|---------------------|-------------|-------------------------------------------------------------|-------------|
|    |                                                |                                                    |                                              | public health policies and programs                                                                                                                                                                      |             |                     |             |                                                             |             |
|    | Traynor et al. [48] (2014) Canada <sup>5</sup> | Secondary analysis of qualitative data; case study | Public health                                | To facilitate incorporation of research evidence into public health policies and programs                                                                                                                | Unspecified | Novice <sup>4</sup> | Unspecified | Unspecified                                                 | Unspecified |
| 15 | Richards et al. [30] (2009) England            | N/A; editorial                                     | Government; public health                    | To facilitate collaboration between politicians and academics to enhance public health                                                                                                                   | 10 years    | Unspecified         | Unspecified | KB organization; (n = unspecified)                          | External    |
| 16 | Healy et al. [28] (2007) Australia             | N/A; grey literature report                        | Academia; government                         | To connect researchers, policy makers and health services to maximize the value of health research                                                                                                       | Unspecified | Unspecified         | Unspecified | KB organization; multiple independent KBs (n = unspecified) | External    |
| 17 | Healy et al. [28] (2007) Australia             | N/A; grey literature report                        | Academia; government                         | To support well-informed health policy across the WHO European region                                                                                                                                    | Unspecified | Unspecified         | Unspecified | KB organization; (n = 20)                                   | External    |
| 18 | van Kammen et al. [17] (2006) Netherlands      | Qualitative; multiple case study                   | Academic; government                         | <u>Netherlands case</u> : To support evidence-based and context-informed decision making; <u>East Africa case</u> : To improve health and equity through evidence informed health policies and practices | Unspecified | Unspecified         | Unspecified | KB organization; (n = 2; individual membership unspecified) | External    |
|    | van Kammen et al. [51] (2006) Netherlands      | Qualitative; case study                            | Academic; government; health insurance board | To facilitate evidence-informed decision making related to subfertility care and reimbursements                                                                                                          | Unspecified | Unspecified         | Unspecified | KB organization; (n = unspecified)                          | External    |

|    |                                                   |                                                    |                                                    |                                                                                                               |                                                               |             |             |                                  |             |
|----|---------------------------------------------------|----------------------------------------------------|----------------------------------------------------|---------------------------------------------------------------------------------------------------------------|---------------------------------------------------------------|-------------|-------------|----------------------------------|-------------|
| 19 | Lyons et al. [42] (2006)<br>Canada                | N/A; grey literature report                        | Academic; government; non-government organizations | To increase decision maker uptake of best practices in integrated stroke care                                 | 3 years                                                       | Unspecified | Unspecified | Multiple independent KBs (n = 4) | External    |
| 20 | Stevens et al. [37] (2005)<br>England             | Mixed methods; case study                          | Government ; non-government organizations          | To promote the use of good quality research evidence in social care practice with children                    | Unspecified                                                   | Unspecified | Unspecified | Independent KB (n = 1)           | External    |
| 21 | Yost et al. [50] (2014)<br>Canada                 | Qualitative; multiple case study                   | Public health                                      | To enhance capacity for and facilitate organizational contexts conducive to evidence informed decision making | Case A: 17 months;<br>Case B: 22 months;<br>Case C: 20 months | Unspecified | Part-time   | Multiple independent KBs (n = 3) | External    |
|    | Traynor et al. [48] (2014)<br>Canada <sup>4</sup> | Secondary analysis of qualitative data; case study | Public health                                      | To enhance capacity for and facilitate organizational contexts conducive to evidence informed decision making | 22 months                                                     | Unspecified | Unspecified | Unspecified                      | Unspecified |
| 22 | Donnelly et al. [35] (2014)<br>Canada             | Qualitative; case study                            | Primary care                                       | To facilitate the application of evaluation knowledge into practice at a memory clinic.                       | 8 months                                                      | Unspecified | Unspecified | Independent KB (n = 1)           | Unspecified |

<sup>1</sup>Some studies (e.g., study 8) include articles that feature findings at differing stages of completion.

<sup>2</sup>KBs with no reported prior knowledge brokering experience were deemed “novice”; KBs with any reported brokering experience were deemed “experienced”.

<sup>3</sup>Note: Two KBs were involved in the study; however, the positions were held consecutively, not concurrently.

<sup>4</sup>While the KBs were masters-prepared and experienced in the public health field, they did not have explicit experience working as a knowledge broker

<sup>5</sup>Traynor et al. reflects on studies 14 and 21

KT=knowledge translation; KB=knowledge broker; N/A=not applicable
