# Supplementary material for: Exploring the function and effectiveness of knowledge brokers as facilitators of knowledge translation in health-related settings: a systematic review and thematic analysis
Source: PubMed Central journal article supplement (PMC4653833; doi:10.1186/s13012-015-0351-9), 2015-11-20
Supplement: 13012_2015_351_MOESM4_ESM.pdf [file 13012_2015_351_MOESM4_ESM.pdf]

#### Additional File 4. Summary of MetaQAT appraisals from studies investigating the use of knowledge brokers in health-related settings

| MetaQAT Criteria                     |                                                                              | MetaQAT Assessment Questions                                                                                                                                                                                                                                                                                                                                                                                                                                          |
|--------------------------------------|------------------------------------------------------------------------------|-----------------------------------------------------------------------------------------------------------------------------------------------------------------------------------------------------------------------------------------------------------------------------------------------------------------------------------------------------------------------------------------------------------------------------------------------------------------------|
| Relevancy                            | Does the study address a topic(s) relevant to the issue under investigation? | <b>[1]</b> Was study justification clearly stated? <b>[2]</b> Do the results of the study apply to the issue under consideration? <b>[3]</b> How similar or different is study population/setting to yours? Is a difference likely to matter? <b>[4]</b> Is the research design appropriate for methodology?                                                                                                                                                          |
| Reliability                          | Is the study presented clearly?                                              | <b>[1]</b> Is rationale for study clearly stated? Does study focus on a clearly defined issue? <b>[2]</b> Is conduct of study clearly described and easy to follow? <b>[3]</b> Can you identify the research design? <b>[4]</b> Are all results included? <b>[5]</b> Are findings presented and discussed within the appropriate context? <b>[6]</b> Is there a conflict of interest statement? <b>[7]</b> Can the study be reproduced with the information provided? |
|                                      | Are the research methodology and results clearly described?                  | <b>[1]</b> Does methodology describe population studied, intervention given, and outcomes? <b>[2]</b> Are all data sources clearly identified? <b>[3]</b> Are inclusion/exclusion criteria defined? <b>[4]</b> Are statistical/analytical methods described? <b>[5]</b> Are data tables consistent with results section? <b>[6]</b> Could methods be reproduced based on information provided?                                                                        |
|                                      | Are ethics procedures described?                                             | <b>[1]</b> Was appropriate informed consent obtained? <b>[2]</b> Was the study approved by an ethics review board?                                                                                                                                                                                                                                                                                                                                                    |
| Validity                             | Is the study methodology appropriate for the scope of research?              | <b>[1]</b> Is research question congruent with study design? <b>[2]</b> Does the methodology match the theory or conceptual model? <b>[3]</b> Are important theoretical factors accounted for in analysis? <b>[4]</b> Are statistical/analytical methods appropriate for the design and/or the question? <b>[5]</b> Are important theoretical factors accounted for in analysis?                                                                                      |
|                                      | Is the research methodology free from bias?                                  | <b>[1]</b> Were there major sources of bias related to: study design? Participants' inclusion or exclusion? Measurement of exposure/outcome or important confounders or predictors? Data sources? Quality assessed? Selection of studies? <b>[2]</b> Are all comprehensive factors included in the research? <b>[3]</b> Are results consistent within the study? <b>[4]</b> Can chance findings be ruled out? <b>[5]</b> Were analyses carried out appropriately?     |
|                                      | Are the authors' conclusions explicit and transparent?                       | <b>[1]</b> Are the results conclusive? <b>[2]</b> Are conclusions clearly derived from the results (i.e. transparent)? <b>[3]</b> Are potential discrepancies discussed?                                                                                                                                                                                                                                                                                              |
|                                      | Can I be confident about findings?                                           | <b>[1]</b> Are there any major methodological flaws that limit the validity of findings? <b>[2]</b> Are the study's results similar to those of the existing body of literature? If not, are the reasons for the difference clearly explained?                                                                                                                                                                                                                        |
| Applicability                        | Can the results be applied within a health-related scope?                    | <b>[1]</b> Can the study results be interpreted and analyzed within the context of health? <b>[2]</b> Are there other important health outcomes to be considered that were not included? <b>[3]</b> Can the results be applied to (public) health practice, based on the validity of the article and its relevance? <b>[4]</b> Are harms and benefits discussed? <b>[5]</b> Were the relevant stakeholders consulted?                                                 |
| <b>Study 4: Waqa, et al. [34,35]</b> |                                                                              |                                                                                                                                                                                                                                                                                                                                                                                                                                                                       |
| Relevancy                            | Does the study address a topic(s) relevant to the issue under investigation? | <b>[1,2]</b> Study addresses how KBs operate in practice <b>[3]</b> Differences related to geographic and policy-related generalizability <b>[4]</b> No methodological exclusion criteria                                                                                                                                                                                                                                                                             |
| Reliability                          | Is the study presented clearly?                                              | <b>[1]</b> Rationale clearly stated <b>[2]</b> Study described well however, another paper referenced for full protocol/ measurement tools; limits clarity <b>[3]</b> Research design identifiable <b>[4]</b> Not all results included (no data regarding participants' knowledge of evidence-informed policymaking prior to the training workshops presented, despite                                                                                                |

|               |                                                                 |                                                                                                                                                                                                                                                                                                                                                                                                                                                                                                                                                                                                                                                                                                                                                                                                                                                                                                      |
|---------------|-----------------------------------------------------------------|------------------------------------------------------------------------------------------------------------------------------------------------------------------------------------------------------------------------------------------------------------------------------------------------------------------------------------------------------------------------------------------------------------------------------------------------------------------------------------------------------------------------------------------------------------------------------------------------------------------------------------------------------------------------------------------------------------------------------------------------------------------------------------------------------------------------------------------------------------------------------------------------------|
|               |                                                                 | study protocol which indicated that these data would be collected) [5] Findings discussed in appropriate context [6] Conflict of interest statement present [7] Study could be reproduced                                                                                                                                                                                                                                                                                                                                                                                                                                                                                                                                                                                                                                                                                                            |
|               | Are the research methodology and results clearly described?     | [1] Inadequate description of <u>population</u> studied (KB team: no description of prior KB experience, training or KBs' areas of expertise; Organizational participants: no data for years of employment, previous experience with policy briefs); <u>intervention</u> (inadequate description of workshops and support preparing policy briefs); and <u>outcomes</u> (no quality appraisal of policy briefs, no policy changes) [2] Not all data sources clearly identified (e.g., quality assessment of policy briefs not identified) [3] Inclusion criteria defined [4] Statistical/analytical methods described clearly [5] Data tables inconsistent with results section (analysis of organizational capacity data presented in Table 2 of [35] citation, but results discussed in [34] citation) [6] Methods could not be reproduced in entirety (analysis of process diaries not described) |
|               | Are ethics procedures described?                                | [1] Consent obtained [2] Ethical approval granted                                                                                                                                                                                                                                                                                                                                                                                                                                                                                                                                                                                                                                                                                                                                                                                                                                                    |
| Validity      | Is the study methodology appropriate for the scope of research? | [1] Research question not congruent with design; but design was congruent with objectives [2] Methodology matches theory [3, 4] Analytical methods not appropriate for design/research question. (Policy brief completion deemed "evidence of skill development" but no quality assessment of policy briefs; no evidence to suggest policy briefs resulted in changes to policies or practices.)                                                                                                                                                                                                                                                                                                                                                                                                                                                                                                     |
|               | Is the research methodology free from bias?                     | [1] Potential bias: <u>participants' inclusion or exclusion</u> (relationship between participant skill level/role and quantity/quality of policy briefs not assessed. No demographic data for those who completed the program (n=27) in contrast to those who did not (n=22)); <u>measurement of confounders</u> (participants interviewed by KB team member who may have trained them); <u>quality assessed</u> (quality of policy briefs not assessed) [2] Some factors critical to interpretation were excluded (KBs level of experience, participant's previous experience with policy brief creation) [3] Results consistent within the study [4] Chance cannot be ruled out (no confidence intervals; no site-specific analyses or comparisons) [5] Appropriate analyses in both studies; however no discussion of inter-rater reliability or member-checking                                 |
|               | Are the authors' conclusions explicit and transparent?          | [1] Results not conclusive: "Policy brief completion" used as indicator of skill development, but no quality appraisal of policy briefs [2] Conclusions did not align with central research objective (i.e., to determine if a KB approach could advance evidence-informed <i>policy development</i> ) - there was a disconnect between the development of policy <i>briefs</i> versus development of actual <i>policies</i> [3] Potential discrepancies not discussed between n=27 participants who completed the program and n=20 policy briefs submitted                                                                                                                                                                                                                                                                                                                                          |
|               | Can I be confident about findings?                              | [1] Validity of findings limited by methodological concerns: outcomes not clearly described; no baseline assessment of evidence use in decision making/policy brief creation [2] Study results were positive in citing KB team as an effective strategy for KT. Reasons for discrepancies between study findings and existing literature discussed                                                                                                                                                                                                                                                                                                                                                                                                                                                                                                                                                   |
| Applicability | Can the results be applied within a health-related scope?       | [1] Study results could be interpreted and analyzed within the context of health if appropriate methodological considerations addressed (e.g., potential biases, nature of results reported) [2] Other important outcomes not included and should be considered (e.g., policy development stemming from policy brief creation; quality of policy briefs) [3] Data necessary for discerning applicability of findings not presented (no quality appraisal of                                                                                                                                                                                                                                                                                                                                                                                                                                          |

|                                  |                                                                              |                                                                                                                                                                                                                                                                                                                                                                                                                                                                                                                                                                                                                                                                                                                                                                                                                                                                                                                                                                                                                                                                                                                                                                          |
|----------------------------------|------------------------------------------------------------------------------|--------------------------------------------------------------------------------------------------------------------------------------------------------------------------------------------------------------------------------------------------------------------------------------------------------------------------------------------------------------------------------------------------------------------------------------------------------------------------------------------------------------------------------------------------------------------------------------------------------------------------------------------------------------------------------------------------------------------------------------------------------------------------------------------------------------------------------------------------------------------------------------------------------------------------------------------------------------------------------------------------------------------------------------------------------------------------------------------------------------------------------------------------------------------------|
|                                  |                                                                              | policy briefs; no description of how KB intervention related to changes in policy/knowledge) [4] Key harms and benefits discussed [5] Relevant stakeholders were consulted, however, incomplete description of KB and participants who completed full intervention (i.e., insufficient understanding of context and n=27 participants who completed full intervention – n=20 of whom presumably submitted policy briefs - and how these individuals differ from the n=22 who dropped out)                                                                                                                                                                                                                                                                                                                                                                                                                                                                                                                                                                                                                                                                                |
| <b>Study 7: Ward et al. [43]</b> |                                                                              |                                                                                                                                                                                                                                                                                                                                                                                                                                                                                                                                                                                                                                                                                                                                                                                                                                                                                                                                                                                                                                                                                                                                                                          |
| Relevancy                        | Does the study address a topic(s) relevant to the issue under investigation? | [1,2] Study addresses how KBs operate in practice [3] Potential differences related to geographic generalizability [4] No methodological exclusion criteria                                                                                                                                                                                                                                                                                                                                                                                                                                                                                                                                                                                                                                                                                                                                                                                                                                                                                                                                                                                                              |
| Reliability                      | Is the study presented clearly?                                              | [1] Rationale clearly stated [2] Study described well when protocol/supplementary files are considered [3] Research design identifiable [4] Not all results included (i.e., limited information on KB activities, training, experience) [5] Findings discussed in appropriate context; however, important outcome data presented only in supplemental file [6] Conflict of interest statement present [7] Study could be reproduced                                                                                                                                                                                                                                                                                                                                                                                                                                                                                                                                                                                                                                                                                                                                      |
|                                  | Are the research methodology and results clearly described?                  | [1] Methodology clearly described <u>population studied</u> and <u>outcomes</u> . Did not clearly describe <u>intervention</u> (i.e., KB activities) [2] Data sources identified (e.g., field notes from KB; participant interviews; document reviews); however, no search terms included for the literature search [3] Inclusion/exclusion criteria not defined [4] Analytical methods described (realist, 'process tracing' approach) [5] Data tables consistent with results section [6] Methods not described clearly enough to reproduce study (no information on KB training, experience, or KB activities)                                                                                                                                                                                                                                                                                                                                                                                                                                                                                                                                                        |
|                                  | Are ethics procedures described?                                             | [1] Consent process not described [2] Ethical approval granted                                                                                                                                                                                                                                                                                                                                                                                                                                                                                                                                                                                                                                                                                                                                                                                                                                                                                                                                                                                                                                                                                                           |
| Validity                         | Is the study methodology appropriate for the scope of research?              | [1] Research question congruent with design [2] Methodology matched theory/conceptual model; however, the effectiveness of KBs as a means to facilitate knowledge exchange was not clearly connected to conceptual model [3] Analytical methods were appropriate for design and research question ('process tracing', thematic analysis) [4] Important theoretical factors not accounted for in analysis (e.g., how effective KBs were in their settings and how this impacted knowledge exchange)                                                                                                                                                                                                                                                                                                                                                                                                                                                                                                                                                                                                                                                                       |
|                                  | Is the research methodology free from bias?                                  | [1] Potential bias: <u>participants</u> (no information on KB training/experience; limited information on service delivery participants), <u>setting</u> (did not provide sufficient connections to policymakers' concerns), <u>methods</u> (limited information on KB activities; no statement of author's personal potential biases), and <u>measurement of outcome/confounders</u> (no statement on the quality or use of evidence in the policy briefs developed by the participants to verify this assertion) [2] Some factors critical to interpretation not described (e.g., no information on length of time KB spent with teams or the nature or quantity of support provided by KB; did not evaluate participants' perceptions of valid knowledge sources prior to the KB intervention; did not evaluate changes in participants' knowledge after working with the KB) [3] Results of KB success were not consistent (Team 1 achieved some goals with uncertain sustainability; Team 2 achieved goals; Team 3 did not achieve goals) *from suppl. file [4] Site-specific comparisons reduced possibility of chance findings; however, effectiveness of KBs may |

|                                                                              |                                                                              |                                                                                                                                                                                                                                                                                                                                                                                                                                                                                                                                                                                                                  |
|------------------------------------------------------------------------------|------------------------------------------------------------------------------|------------------------------------------------------------------------------------------------------------------------------------------------------------------------------------------------------------------------------------------------------------------------------------------------------------------------------------------------------------------------------------------------------------------------------------------------------------------------------------------------------------------------------------------------------------------------------------------------------------------|
|                                                                              |                                                                              | differ based on mixed success rate of teams [5] Appropriate analyses; but no member-checking or interpretation verification                                                                                                                                                                                                                                                                                                                                                                                                                                                                                      |
|                                                                              | Are the authors' conclusions explicit and transparent?                       | [1] Results related to success of knowledge exchange sites (in suppl. file) were not presented clearly [2] Conclusions clearly derived from results [3] Potential discrepancies not discussed related to effectiveness of KBs to support/facilitate knowledge exchange                                                                                                                                                                                                                                                                                                                                           |
|                                                                              | Can I be confident about findings?                                           | [1] Validity of findings limited by methodological concerns: insufficient description of KB training/experience and service delivery participants; limited information on KB activities in each setting [2] Results were mixed relative to the KBs' ability to facilitate knowledge exchange at each site *from suppl. file                                                                                                                                                                                                                                                                                      |
| Applicability                                                                | Can the results be applied within a health-related scope?                    | [1] Study results could be interpreted and analyzed within the context of health if appropriate methodological considerations considered [2] Other important outcomes not included and should be considered (e.g., policy implications) [3] Generally, the results (i.e., framework) could be applied in other health settings, however, because very few details provided about the participants and the KB, it is difficult to generalize the findings [5] Not all relevant stakeholders consulted (e.g., no member-checking to verify theoretical assumptions; no clear consideration of policy implications) |
| <b>Study 8: Russell et al. [52]; Cameron et al. [44]; Rivard et al. [39]</b> |                                                                              |                                                                                                                                                                                                                                                                                                                                                                                                                                                                                                                                                                                                                  |
| Relevancy                                                                    | Does the study address a topic(s) relevant to the issue under investigation? | [1,2] Study addresses how KBs operate in practice [3] No significant issues with generalizability [4] No methodological exclusion criteria                                                                                                                                                                                                                                                                                                                                                                                                                                                                       |
| Reliability                                                                  | Is the study presented clearly?                                              | [1] Rationale clearly stated [2] Study described well and easy to follow [3] Research design identifiable [4] All results are included (when all articles considered collectively) [5] Findings presented in appropriate context [6] Conflict of interest statement present [7] Study could be reproduced                                                                                                                                                                                                                                                                                                        |
|                                                                              | Are the research methodology and results clearly described?                  | [1] Methodology describes the <u>population studied</u> , ( <u>physiotherapist KBs</u> ) <u>intervention</u> (KB network, broker to the KBs, online support, interactive workshop), and <u>outcomes</u> (change in self-reported knowledge and use of measurement tools; KB process evaluation) [2] All sources of information identified [3] Inclusion/exclusion criteria defined [4] Statistical and analytical methods described [5] Data tables consistent with results section [6] Methods could be reproduced                                                                                              |
|                                                                              | Are ethics procedures described?                                             | [1] Consent obtained [2] Ethical approval granted                                                                                                                                                                                                                                                                                                                                                                                                                                                                                                                                                                |
| Validity                                                                     | Is the study methodology appropriate for the scope of research?              | [1] Research question congruent with design [2] Methodology matched conceptual model [3] Statistical and analytical methods appropriate for design and research question [4] Important theoretical factors accounted for in the analysis (e.g., clear connections between KB intervention and KtoA theoretical framework)                                                                                                                                                                                                                                                                                        |
|                                                                              | Is the research methodology free from bias?                                  | [1] No major sources of bias identified [2] Comprehensive factors critical to interpretation included in research [3] Results consistent within the study [4] Chance findings can be ruled out (i.e., confidence interval data; region-specific analyses and comparisons) [5] Analyses carried out appropriately                                                                                                                                                                                                                                                                                                 |
|                                                                              | Are the authors' conclusions explicit and transparent?                       | [1] Results were conclusive [2] Conclusions clearly derived from results [3] Potential discrepancies were discussed relative to geographic differences, research design, and sample size                                                                                                                                                                                                                                                                                                                                                                                                                         |

|                                      |                                                                              |                                                                                                                                                                                                                                                                                                                                                                                                                                                                                                                                                                                                                            |
|--------------------------------------|------------------------------------------------------------------------------|----------------------------------------------------------------------------------------------------------------------------------------------------------------------------------------------------------------------------------------------------------------------------------------------------------------------------------------------------------------------------------------------------------------------------------------------------------------------------------------------------------------------------------------------------------------------------------------------------------------------------|
|                                      | Can I be confident about findings?                                           | <b>[1]</b> No major methodological flaws that limit validity of findings <b>[2]</b> Where outcome data conflicted with existing literature, authors provided sound reasons for discrepancies in findings                                                                                                                                                                                                                                                                                                                                                                                                                   |
| Applicability                        | Can the results be applied within a health-related scope?                    | <b>[1]</b> Results could be interpreted/analyzed within health context <b>[2]</b> Key important outcomes were included and evaluated (change in knowledge and practice) <b>[3]</b> Results could be applied to health-related practice based on the validity and relevance of the article <b>[5]</b> Relevant stakeholders consulted                                                                                                                                                                                                                                                                                       |
| <b>Study 9: Campbell et al. [36]</b> |                                                                              |                                                                                                                                                                                                                                                                                                                                                                                                                                                                                                                                                                                                                            |
| Relevancy                            | Does the study address a topic(s) relevant to the issue under investigation? | <b>[1,2]</b> Study addresses how KBs operate in practice <b>[3]</b> Potential issues related to generalizability <b>[4]</b> No methodological exclusion criteria                                                                                                                                                                                                                                                                                                                                                                                                                                                           |
| Reliability                          | Is the study presented clearly?                                              | <b>[1]</b> Rationale clearly stated <b>[2]</b> Study not described well <b>[3]</b> Research design not identifiable <b>[4]</b> Not all results included (no KB feedback; Evidence Check limitations; contextual factors) <b>[5]</b> Findings discussed in appropriate context; but no KB perspectives included <b>[6]</b> No conflict of interest statement provided <b>[7]</b> Study could not be reproduced                                                                                                                                                                                                              |
|                                      | Are the research methodology and results clearly described?                  | <b>[1]</b> Methodology did not adequately describe: <u>population</u> (no data on participants' professional background or research/policy experience), <u>intervention</u> (no review appraisal), <u>outcomes</u> (no methods for evaluating effectiveness of KBs) <b>[2]</b> Data sources not clearly described (no descriptive data on participants; interview content not described) <b>[3]</b> No inclusion/exclusion criteria <b>[4]</b> No analytical methods described <b>[5]</b> Data tables consistent with results section <b>[6]</b> Methods could not be reproduced based on information provided             |
|                                      | Are ethics procedures described?                                             | <b>[1]</b> Consent process not described <b>[2]</b> Ethical approval not described                                                                                                                                                                                                                                                                                                                                                                                                                                                                                                                                         |
| Validity                             | Is the study methodology appropriate for the scope of research?              | <b>[1]</b> No research design/question specified <b>[2]</b> Evidence Check process appeared to match underlying theory; research methodology not clearly described <b>[3]</b> Analytical methods not described <b>[4]</b> Important theoretical factors not accounted for in the analysis (experience of KB, political climate)                                                                                                                                                                                                                                                                                            |
|                                      | Is the research methodology free from bias?                                  | <b>[1]</b> Potential bias: <u>design</u> (no design identified; did not identify how participants were selected or recruited); <u>participants</u> (no inclusion/exclusion criteria); <u>outcome measurement</u> (no KB perspectives included); <u>quality assessed</u> (no quality appraisal conducted) <b>[2]</b> Factors critical to interpretation not included (KB perspectives, impact of political climate) <b>[3]</b> Results consistent within the study <b>[4]</b> Chance findings cannot be ruled out (no site comparisons) <b>[5]</b> Unable to assess appropriateness of analyses; not described sufficiently |
|                                      | Are the authors' conclusions explicit and transparent?                       | <b>[1]</b> Results not conclusive: did not describe challenges with process; did not include KBs perspectives; did not describe how reviews were used by decision makers; no comment on the effectiveness of KBs <b>[2]</b> Conclusions not clearly derived from results (no description of direct impacts on policy or practice) <b>[3]</b> Potential discrepancies not discussed                                                                                                                                                                                                                                         |
|                                      | Can I be confident about findings?                                           | <b>[1]</b> Validity of findings limited by methodological concerns: no research design identified; no participant selection/recruitment; no inclusion/exclusion criteria; no KB perspectives; no assessment of effectiveness <b>[2]</b> Study results cited KBs as an effective strategy for KT in health policy contexts                                                                                                                                                                                                                                                                                                  |
| Applicability                        | Can the results be applied within a health-related scope?                    | <b>[1]</b> Results could likely not be interpreted and analyzed within the context of health policy; data necessary for discerning reliability and generalizability not presented <b>[2]</b> Other important outcomes not included and should be                                                                                                                                                                                                                                                                                                                                                                           |

|                                                                                   |                                                                              |                                                                                                                                                                                                                                                                                                                                                                                                                         |
|-----------------------------------------------------------------------------------|------------------------------------------------------------------------------|-------------------------------------------------------------------------------------------------------------------------------------------------------------------------------------------------------------------------------------------------------------------------------------------------------------------------------------------------------------------------------------------------------------------------|
|                                                                                   |                                                                              | considered (e.g., KB perspectives, effectiveness of KBs, political climate) [3] Results could not be applied to health policy initiatives based on the validity of this article [5] Not all relevant stakeholders were consulted (e.g., KBs)                                                                                                                                                                            |
| <b>Study 14: Dobbins, et al. [21,46]; Traynor et al. [48]; Robeson et al [38]</b> |                                                                              |                                                                                                                                                                                                                                                                                                                                                                                                                         |
| Relevancy                                                                         | Does the study address a topic(s) relevant to the issue under investigation? | [1,2] Study addresses how KBs operate in practice [3] No significant issues with generalizability [4] No methodological exclusion criteria                                                                                                                                                                                                                                                                              |
| Reliability                                                                       | Is the study presented clearly?                                              | [1] Rationale clearly stated [2] Study described well [3] Research design identifiable (RCT) [4] All results included [5] Findings presented and discussed in appropriate context [6] Conflict of interest statement present [7] Study could be reproduced                                                                                                                                                              |
|                                                                                   | Are the research methodology and results clearly described?                  | [1] Methodology described population studied, intervention given, and outcomes [2] Data sources clearly identified [3] Inclusion/exclusion criteria defined [4] Analytical methods described [5] Data tables consistent with results section [6] Methods could be reproduced based on information provided                                                                                                              |
|                                                                                   | Are ethics procedures described?                                             | [1] Consent obtained [2] Ethical approval granted                                                                                                                                                                                                                                                                                                                                                                       |
| Validity                                                                          | Is the study methodology appropriate for the scope of research?              | [1] Research question congruent with design [2] Methodology matched conceptual model [3] Statistical and analytical methods appropriate for RCT design and research question [4] Important theoretical factors accounted for in the analysis (e.g., multiple measures of evidence-informed decision making)                                                                                                             |
|                                                                                   | Is the research methodology free from bias?                                  | [1] No major biases identified [2] Factors critical to interpretation were included [3] Results consistent within the study [4] Chance findings cannot be ruled out (two KBs used independently, but cannot account for individual-level factors that may have influenced the effectiveness of the KB, e.g., soft skills) [5] Analyses carried out appropriately                                                        |
|                                                                                   | Are the authors' conclusions explicit and transparent?                       | [1] Results conclusive [2] Conclusions clearly derived from results [3] Potential discrepancies discussed related to organizational value of research evidence and passive vs. active methods of KTE                                                                                                                                                                                                                    |
|                                                                                   | Can I be confident about findings?                                           | [1] No major methodological flaws that limit the validity of findings [2] Study results did not find KBs to be an effective strategy for KT in public health settings; results situated in current literature                                                                                                                                                                                                           |
| Applicability                                                                     | Can the results be applied within a health-related scope?                    | [1] Results could be interpreted/analyzed within health context [2] Key important outcomes were included and evaluated (change in policy/practice) [3] Results could be applied to health-related practice, based on the validity of the article and its relevance [5] Relevant stakeholders consulted                                                                                                                  |
| <b>Study 18: van Kammen et al. [17,51]</b>                                        |                                                                              |                                                                                                                                                                                                                                                                                                                                                                                                                         |
| Relevancy                                                                         | Does the study address a topic(s) relevant to the issue under investigation? | [1,2] Study addresses how KBs operate in practice [3] Potential issues related to geographic generalizability [4] No methodological exclusion criteria                                                                                                                                                                                                                                                                  |
| Reliability                                                                       | Is the study presented clearly?                                              | [1] Rationale clearly stated [2] Study not described well nor easy to follow ("step 1" describes evidence synthesis with no description of study selection or appraisal) [3] Research design not evident [4] Not all results included (e.g., synthesis) [5] Policy-specific findings discussed in appropriate context for ZonMw initiative [6] Conflict of interest statement present [7] Study could not be reproduced |

|                                    |                                                                              |                                                                                                                                                                                                                                                                                                                                                                                                                                                                                                                                                                                 |
|------------------------------------|------------------------------------------------------------------------------|---------------------------------------------------------------------------------------------------------------------------------------------------------------------------------------------------------------------------------------------------------------------------------------------------------------------------------------------------------------------------------------------------------------------------------------------------------------------------------------------------------------------------------------------------------------------------------|
|                                    | Are the research methodology and results clearly described?                  | <b>[1]</b> Methodology did not adequately describe: <u>population</u> (no data on experience, credentials, organizational role), <u>intervention</u> (insufficient detail to reproduce). Methodology adequately described: <u>outcomes</u> for ZonMw KB initiative (infertility policy changes) but not REACH initiative <b>[2]</b> Sources of information not clearly identified <b>[3]</b> Exclusion of pharmaceutical industry individuals <b>[4]</b> No analytical methods described <b>[6]</b> Methods could not be reproduced                                             |
|                                    | Are ethics procedures described?                                             | <b>[1]</b> Consent process not described <b>[2]</b> Ethical approval not described                                                                                                                                                                                                                                                                                                                                                                                                                                                                                              |
| Validity                           | Is the study methodology appropriate for the scope of research?              | <b>[1]</b> No research design/question specified <b>[2]</b> No guiding theory; cannot assess alignment with methodology <b>[3]</b> Analysis not described; cannot assess appropriateness of methodology <b>[4]</b> No guiding theory/conceptual model; cannot assess alignment with analysis                                                                                                                                                                                                                                                                                    |
|                                    | Is the research methodology free from bias?                                  | <b>[1]</b> Potential bias: study <u>participants</u> (pharmaceutical reps excluded; other participants not described clearly); <u>data sources</u> (not described clearly, no specific data sources informing policy decisions referenced) <b>[2]</b> Factors critical to interpretation not included (ZonMw activities not described clearly) <b>[3]</b> Results consistent within the study <b>[4]</b> Chance findings cannot be ruled out (no site-specific analyses or comparisons) <b>[5]</b> Analyses not described adequately enough to assess potential sources of bias |
|                                    | Are the authors' conclusions explicit and transparent?                       | <b>[1]</b> Results conclusive for ZonMw initiative <b>[2]</b> Conclusions derived from results <b>[3]</b> Potential discrepancies discussed (political cause of failure to adopt 2 <sup>nd</sup> recommendation)                                                                                                                                                                                                                                                                                                                                                                |
|                                    | Can I be confident about findings?                                           | <b>[1]</b> Validity of findings limited by methodological concerns: (no conceptual model, research design and analysis not described) <b>[2]</b> Results were positive in citing KBs as an effective strategy for KT, but acknowledged contextual limitations and considerations that may limit the effectiveness of KBs (e.g., political will)                                                                                                                                                                                                                                 |
| Applicability                      | Can the results be applied within a health-related scope?                    | <b>[1]</b> Results cannot be interpreted/analyzed within the context of health based on the validity of this article <b>[2]</b> Other important outcomes not included and should be considered (e.g., follow-up actions stemming from policy decision, KB approach) <b>[3]</b> Results cannot be applied to other health-related settings based on the validity of this article (i.e., the contribution of the KB as a facilitator of this change cannot be determined based on the information contained in this report) <b>[5]</b> Relevant stakeholders were consulted.      |
| <b>Study 19: Lyons et al. [42]</b> |                                                                              |                                                                                                                                                                                                                                                                                                                                                                                                                                                                                                                                                                                 |
| Relevancy                          | Does the study address a topic(s) relevant to the issue under investigation? | <b>[1,2]</b> Study addresses how KBs operate in practice <b>[3]</b> No significant issues with generalizability <b>[4]</b> No methodological exclusion criteria                                                                                                                                                                                                                                                                                                                                                                                                                 |
| Reliability                        | Is the study presented clearly?                                              | <b>[1]</b> Rationale clearly stated <b>[2]</b> Study not described well (no methods/outcome evaluation; NB: study in progress at time of report) <b>[3]</b> Research design not identifiable; could not be reproduced <b>[4]</b> Not all results included <b>[5]</b> Findings presented in appropriate context <b>[6]</b> No conflict of interest statement <b>[7]</b> Study could not be reproduced with information provided                                                                                                                                                  |
|                                    | Are the research methodology and results clearly described?                  | <b>[1]</b> Methodology did not adequately describe: <u>population studied</u> (did not indicate who was interviewed, or when), <u>intervention</u> (time/intensity of KB initiative not described; no site comparison), or <u>outcomes</u> (study in progress) <b>[2]</b> Data sources not clearly identified <b>[3]</b> Inclusion/ exclusion criteria not defined <b>[4]</b> Analytic methods not described <b>[6]</b> Methods could not be reproduced                                                                                                                         |

|                                                        |                                                                              |                                                                                                                                                                                                                                                                                                                                                                                                                                                                                                                                                                                                                                                                                              |
|--------------------------------------------------------|------------------------------------------------------------------------------|----------------------------------------------------------------------------------------------------------------------------------------------------------------------------------------------------------------------------------------------------------------------------------------------------------------------------------------------------------------------------------------------------------------------------------------------------------------------------------------------------------------------------------------------------------------------------------------------------------------------------------------------------------------------------------------------|
|                                                        | Are ethics procedures described?                                             | <b>[1]</b> Consent process not described <b>[2]</b> Ethical approval not described                                                                                                                                                                                                                                                                                                                                                                                                                                                                                                                                                                                                           |
| Validity                                               | Is the study methodology appropriate for the scope of research?              | <b>[1]</b> Research objective congruent with design <b>[2]</b> No theory/conceptual model so cannot assess alignment with methodology <b>[3]</b> Cannot assess appropriateness of methodology (analysis not described) <b>[4]</b> No guiding theory/conceptual model so cannot assess alignment with analysis                                                                                                                                                                                                                                                                                                                                                                                |
|                                                        | Is the research methodology free from bias?                                  | <b>[1]</b> Potential bias: <u>design</u> (no comparison between n=6 participant organizations); <u>participants</u> (no demographic data on participants or KBs; no exclusion criteria); <u>measurement of outcome/confounders</u> (no pre/post-KB intervention comparisons; study in progress at time of report); <u>quality assessed</u> (no objective quality appraisal) <b>[2]</b> Factors critical to interpretation not included (comparisons between sites and pre/post-KB intervention) <b>[3]</b> Results not consistent within the study <b>[4]</b> Chance findings cannot be ruled out (no site comparisons) <b>[5]</b> Cannot assess appropriateness of analysis (not described) |
|                                                        | Are the authors' conclusions explicit and transparent?                       | <b>[1]</b> Results inconclusive; study in progress <b>[2]</b> Conclusions not clearly derived from results (no discussion of analytic technique used to discern key findings) <b>[3]</b> Potential discrepancies discussed related to timing of partnerships, project goal negotiation, provincial priorities related to stroke, divergent mandates                                                                                                                                                                                                                                                                                                                                          |
|                                                        | Can I be confident about findings?                                           | <b>[1]</b> Validity of findings limited by methodological concerns: no guiding conceptual model; no comparisons between sites and pre/post-KB intervention; unidentifiable study design; participants; data sources; outcome measurement <b>[2]</b> Results were positive in citing KBs as an effective strategy for KT, but noted contextual factors that may limit effectiveness of KBs (e.g., organizational priorities, funding, and timing)                                                                                                                                                                                                                                             |
| Applicability                                          | Can the results be applied within a health-related scope?                    | <b>[1]</b> Results should not be interpreted within health context until study is complete and full appraisal of methods and results can be performed <b>[2]</b> Other important outcomes were not included and should be considered (pre- and post-KB comparison of team communication) <b>[3]</b> Data necessary for discerning applicability of findings not presented <b>[4]</b> Key harms and benefits discussed (organizational priorities, funding, and timing) <b>[5]</b> Relevant stakeholders were consulted                                                                                                                                                                       |
| <b>Study 21: Yost et al. [50]; Traynor et al. [48]</b> |                                                                              |                                                                                                                                                                                                                                                                                                                                                                                                                                                                                                                                                                                                                                                                                              |
| Relevancy                                              | Does the study address a topic(s) relevant to the issue under investigation? | <b>[1,2]</b> Study addresses how KBs operate in practice <b>[3]</b> No significant issues with generalizability <b>[4]</b> No methodological exclusion criteria                                                                                                                                                                                                                                                                                                                                                                                                                                                                                                                              |
| Reliability                                            | Is the study presented clearly?                                              | <b>[1]</b> Rationale clearly stated <b>[2]</b> Study described well and easy to follow <b>[3]</b> Research design identifiable <b>[4]</b> All results not included (quantitative results to be included in upcoming paper) <b>[6]</b> Conflict of interest statement present <b>[7]</b> Study could not be reproduced (no detailed description of measurement of change in knowledge, skill, practice)                                                                                                                                                                                                                                                                                       |
|                                                        | Are the research methodology and results clearly described?                  | <b>[1]</b> Methodology describes population studied, and intervention given; but insufficient description of quantitative measurement of change in knowledge, skill, practice <b>[2]</b> All data sources not identified (measurement of change in knowledge, skill, practice) <b>[3]</b> Inclusion and exclusion criteria defined <b>[4]</b> Analytical methods not described in entirety (quantitative measurement of change in knowledge, skill, practice) <b>[5]</b> Results in tables not consistent with results section <b>[6]</b> Methods could not be reproduced                                                                                                                    |



|               |                                                                 |                                                                                                                                                                                                                                                                                                                                                                                                                                                                                                                            |
|---------------|-----------------------------------------------------------------|----------------------------------------------------------------------------------------------------------------------------------------------------------------------------------------------------------------------------------------------------------------------------------------------------------------------------------------------------------------------------------------------------------------------------------------------------------------------------------------------------------------------------|
|               | Are ethics procedures described?                                | <b>[1]</b> Consent obtained <b>[2]</b> Ethical approval granted                                                                                                                                                                                                                                                                                                                                                                                                                                                            |
| Validity      | Is the study methodology appropriate for the scope of research? | <b>[1]</b> Research question congruent with design <b>[2]</b> Methodology matches conceptual model <b>[3]</b> Analytical methods are appropriate <b>[4]</b> Important theoretical factors are accounted for in the analysis (e.g., McKinsy 7-S model informed coding structure)                                                                                                                                                                                                                                            |
|               | Is the research methodology free from bias?                     | <b>[1]</b> Potential bias: <u>study design</u> (no comparison of tool use at sites without a KB); <u>sampling</u> (possible lack of data saturation); <u>outcome measurement</u> (KB who completed intervention conducted interviews) <b>[2]</b> Not all critical factors included (contextual factors not fully described) <b>[3]</b> Results consistent within the study <b>[4]</b> Chance findings cannot be ruled out (no comparisons with sites that did not have a KB) <b>[5]</b> Analyses carried out appropriately |
|               | Are the authors' conclusions explicit and transparent?          | <b>[1]</b> Results conclusive <b>[2]</b> Conclusions derived from results <b>[3]</b> Potential discrepancies not discussed related to the differences between cases in their use of the tools                                                                                                                                                                                                                                                                                                                              |
|               | Can I be confident about findings?                              | <b>[1]</b> Validity of findings limited by methodological concerns: inadequate description of quantitative measurement of change in knowledge, skill, practice; KB who completed intervention conducted interviews; contextual factors not fully described <b>[2]</b> Results similar to those of the existing body of literature                                                                                                                                                                                          |
| Applicability | Can the results be applied within a health-related scope?       | <b>[1]</b> Results could be interpreted within health context if appropriate methodological considerations accounted for (case study design limits transferability, potential bias in measurement of outcomes) <b>[2]</b> Other important outcomes not included (baseline measures; use of tools without KB) <b>[3]</b> Results could be applied to health-related practice <b>[4]</b> Key harms and benefits not discussed <b>[5]</b> Relevant stakeholders were consulted                                                |
